# Supplementary material for: Engineering and optimising deaminase fusions for genome editing
Source: PubMed Central journal article supplement (PMC5097136; doi:10.1038/ncomms13330), 2016-11-02
Supplement: ncomms13330-s1.pdf [file ncomms13330-s1.pdf]

1 **Supplementary Figure 1**

2

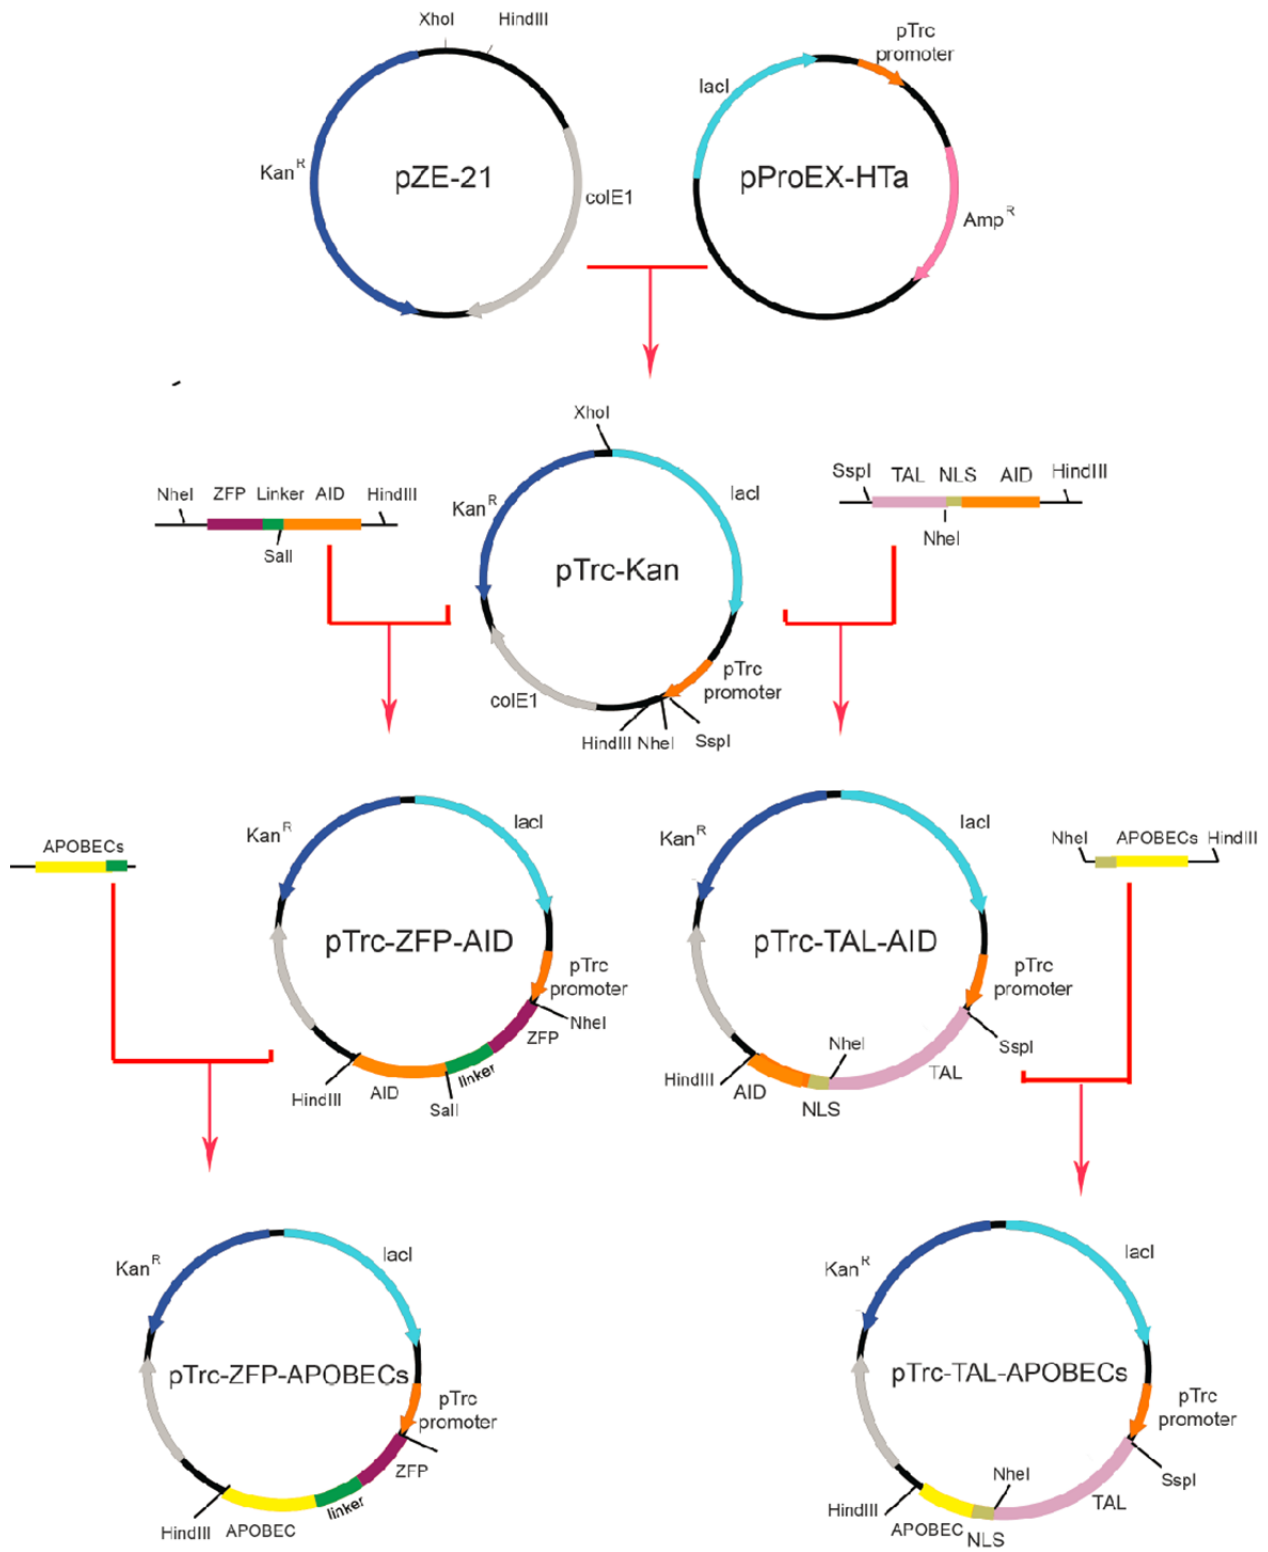

3

4  
5  
6  
7  
8  
9  
10  
11  
12  
13  
14  
15  
16  
17  
18  
19  
20  
21  
22  
23  
24  
25  
26  
27  
28  
29  
30  
31  
32  
33  
34  
35  
36  
37  
38  
39  
40  
41  
42  
43  
44  
45  
46  
47  
48

**Supplementary Figure 1** | Schematic representation of the design and construction of targeted deaminase expression vectors. The expression vector pTrc-Kan was derived from pZE-21 and pROEx-HTa. We inserted ZF-AID fusions into pTrc-Kan to generate pTrc-ZF-AIDs. From pTrc-ZF-AIDs, we swapped AID with other APOBECs to further construct pTrc-ZF-APOBECs. In parallel, pTrc-TALE-AIDs were constructed by inserting TAL-AID fusions into pTrc-Kan. pTrc-TALE-APOBECs were generated by replacing the AID coding sequence with APOBECs coding sequences.

49 **Supplementary Figure 2**  
 50

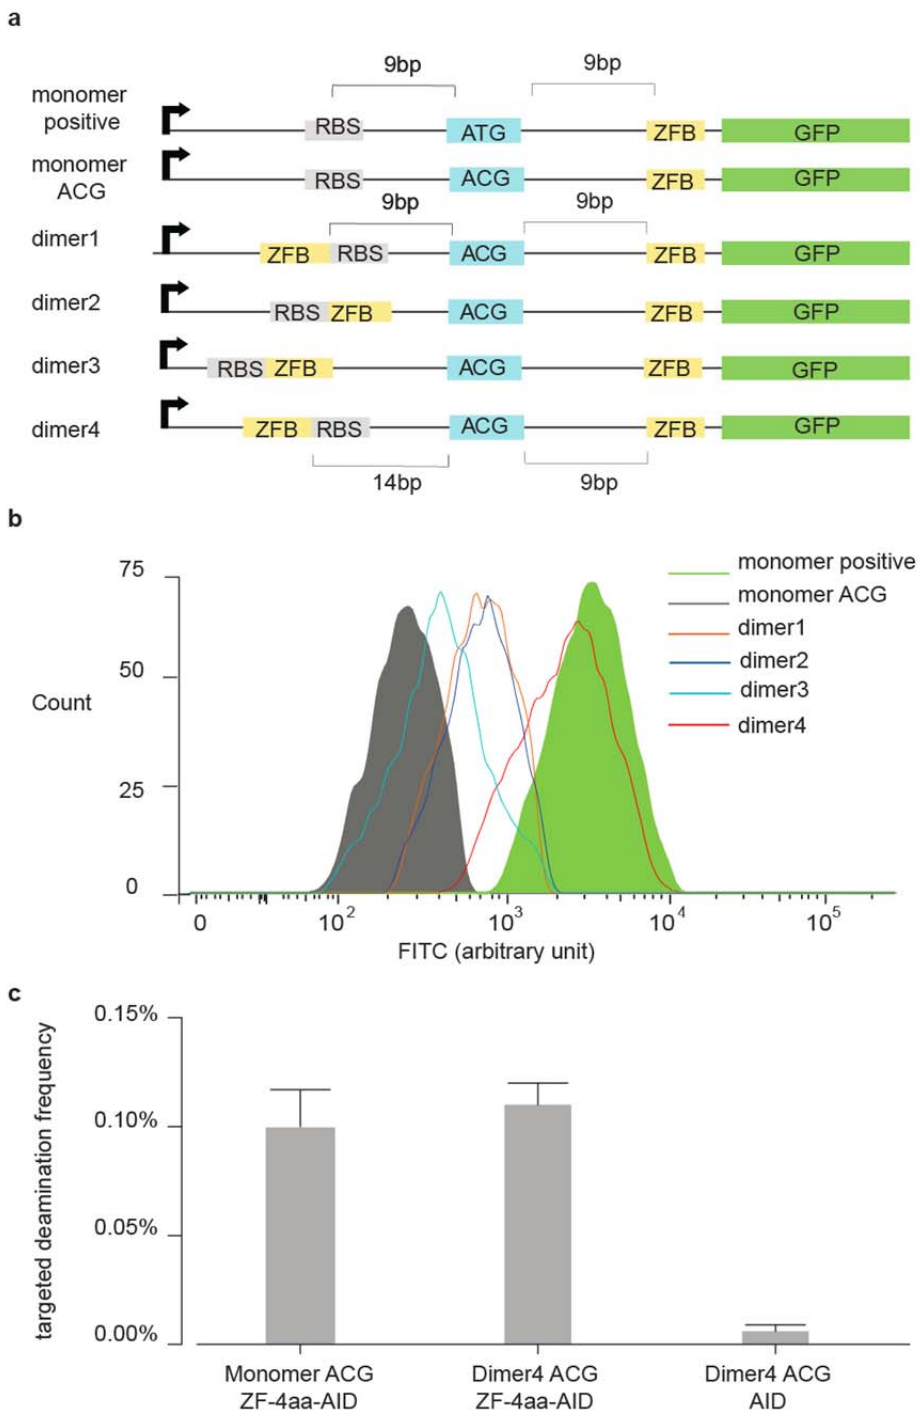

51  
 52  
 53  
 54

55 **Supplementary Figure 2** | Test of targeted deaminase frequency on the reporter with two ZF  
56 binding sites. **a**, Schematic representation of the modified GFP reporters with two ZF  
57 binding sites. In the monomer reporter, a ZF binding site (ZFB) lies 9bp downstream of the  
58 start codon (in blue). In the dimer reporter constructs, an additional ZFB lies either 9bp  
59 (dimer1 and dimer3), 6bp (dimer2), or 14bp (dimer4) upstream of the start codon. Arrows  
60 indicate promoter, RBS indicate position of ribosome binding site. **b**, Overlap histogram of  
61 GFP expression level from the different reporters. Dimer1, 2 and 3 exhibited significant  
62 overlaps with the negative control (uninduced monomer ACG reporter), suggesting that the  
63 alterations to the length or sequence between the RBS and start codon compromised the  
64 translation of GFP. In contrast, the dimer4 reporter showed distinct GFP fluorescence, so  
65 we chose it for the following test. **c**, Targeted deamination frequency on dimer and  
66 monomer reporters. ZF-4aa-AID expression led to similar GFP rescue frequency in both the  
67 dimer4 ACG and monomer ACG GFP reporter systems. Conversely, AID expression alone  
68 did not result in any detectable GFP rescue signal, indicating that the ZF-4aa-ZFP monomer  
69 was able to specifically target the genomic site. Targeted deamination frequency was  
70 quantified via percentage of GFP-expressing cells in the population. All error bars indicate  
71 s.d.. Experiments were performed in triplicate.

72  
73

74 **Supplementary Figure 3**  
75

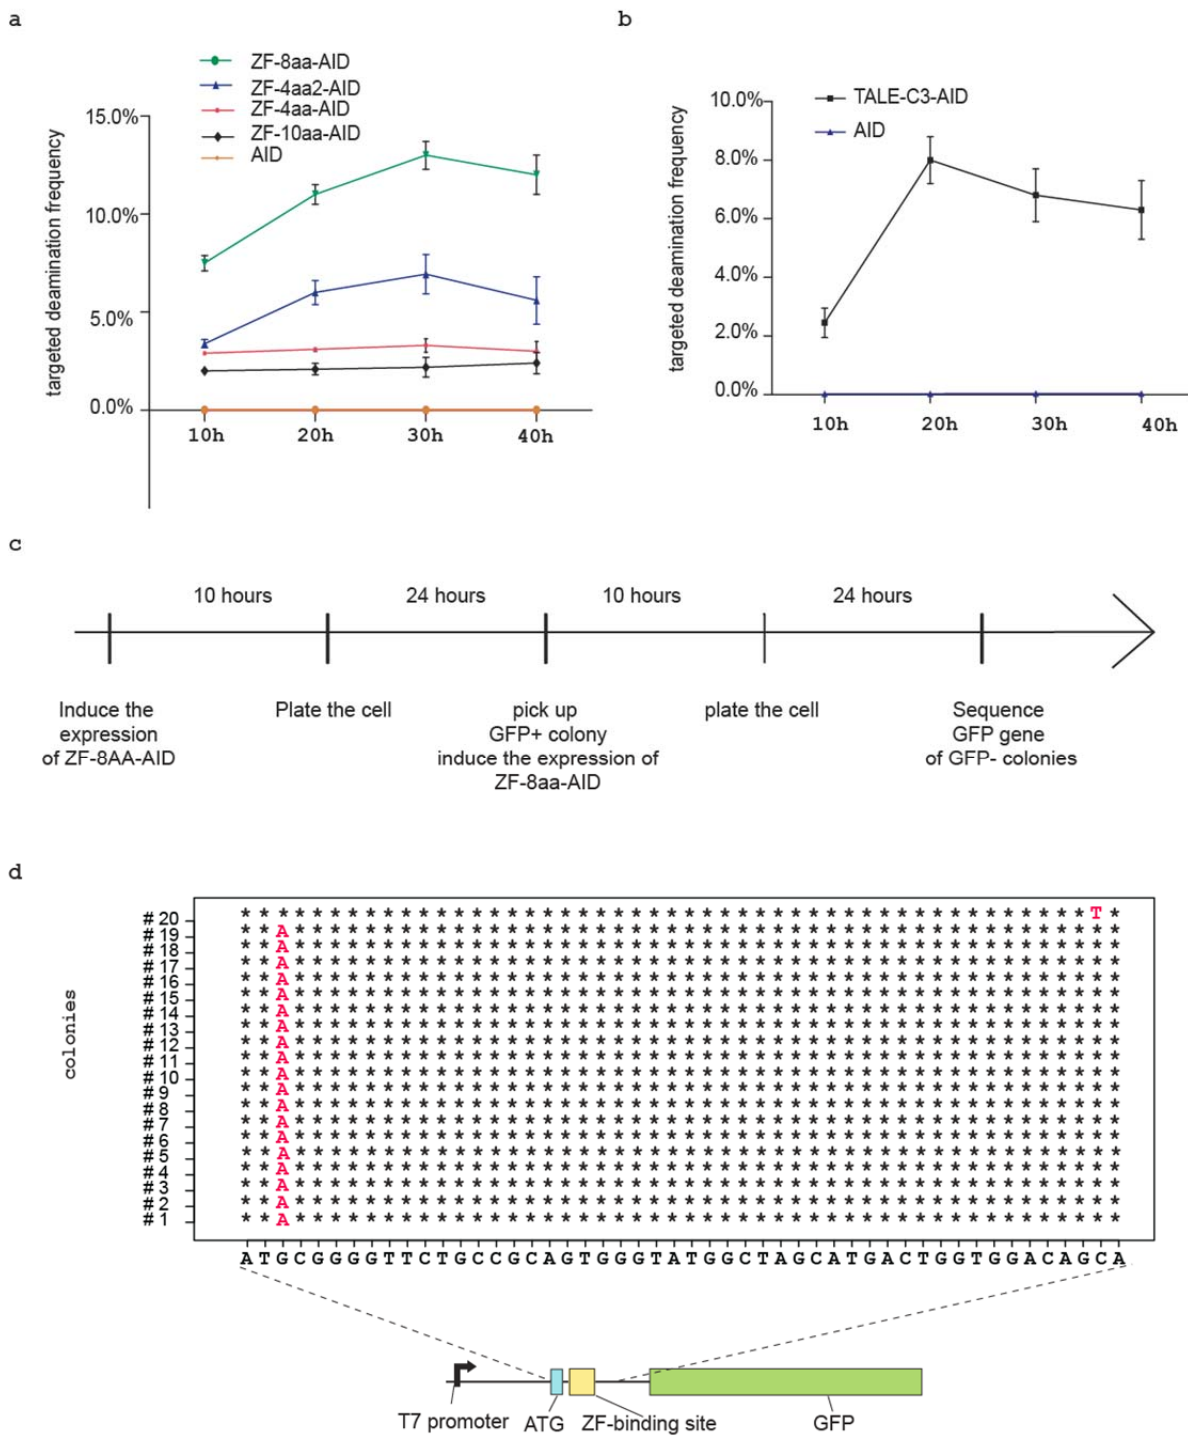

76  
77

78  
79  
80  
81  
82  
83  
84  
85  
86  
87  
88  
89  
90  
91  
92  
93  
94  
95

**Supplementary Figure 3** | Secondary mutations led to the decline of GFP rescue efficiency **a**, Targeted deamination frequency peaked following 30 hours of ZF-AID induction and dropped after that. The targeted deaminase frequencies were measured by flow cytometry analysis of GFP expression. Bacterial culture was diluted 1:100 every 10 h to maintain continuous cell proliferation. **b**, Targeted deamination frequency as measured by GFP+ cell fraction peaked following 20 hours of TALE-AID induction and dropped after that. Bacterial culture was diluted 1:100 every 10hrs to maintain continuous cell proliferation. **c**, Time line depicting the experiment design to capture secondary mutations. **d**, Sanger DNA sequencing revealed that prolonged ZF-AID induction led to secondary mutations that abolished the expression of GFP. 1kb of the *gfp* gene was sequenced over 20 GFP- colonies; only the mutated part is shown in the table. The original sequence is listed below and the schematic graph of the GFP cassette shows the corresponding positions of this sequence. "\*" indicates positions where the sequence is identical with the wild type *gfp*. Red letters indicate the mutated bases. All error bars indicate s.d.. Experiments were performed in triplicate.

96 **Supplementary Figure 4**

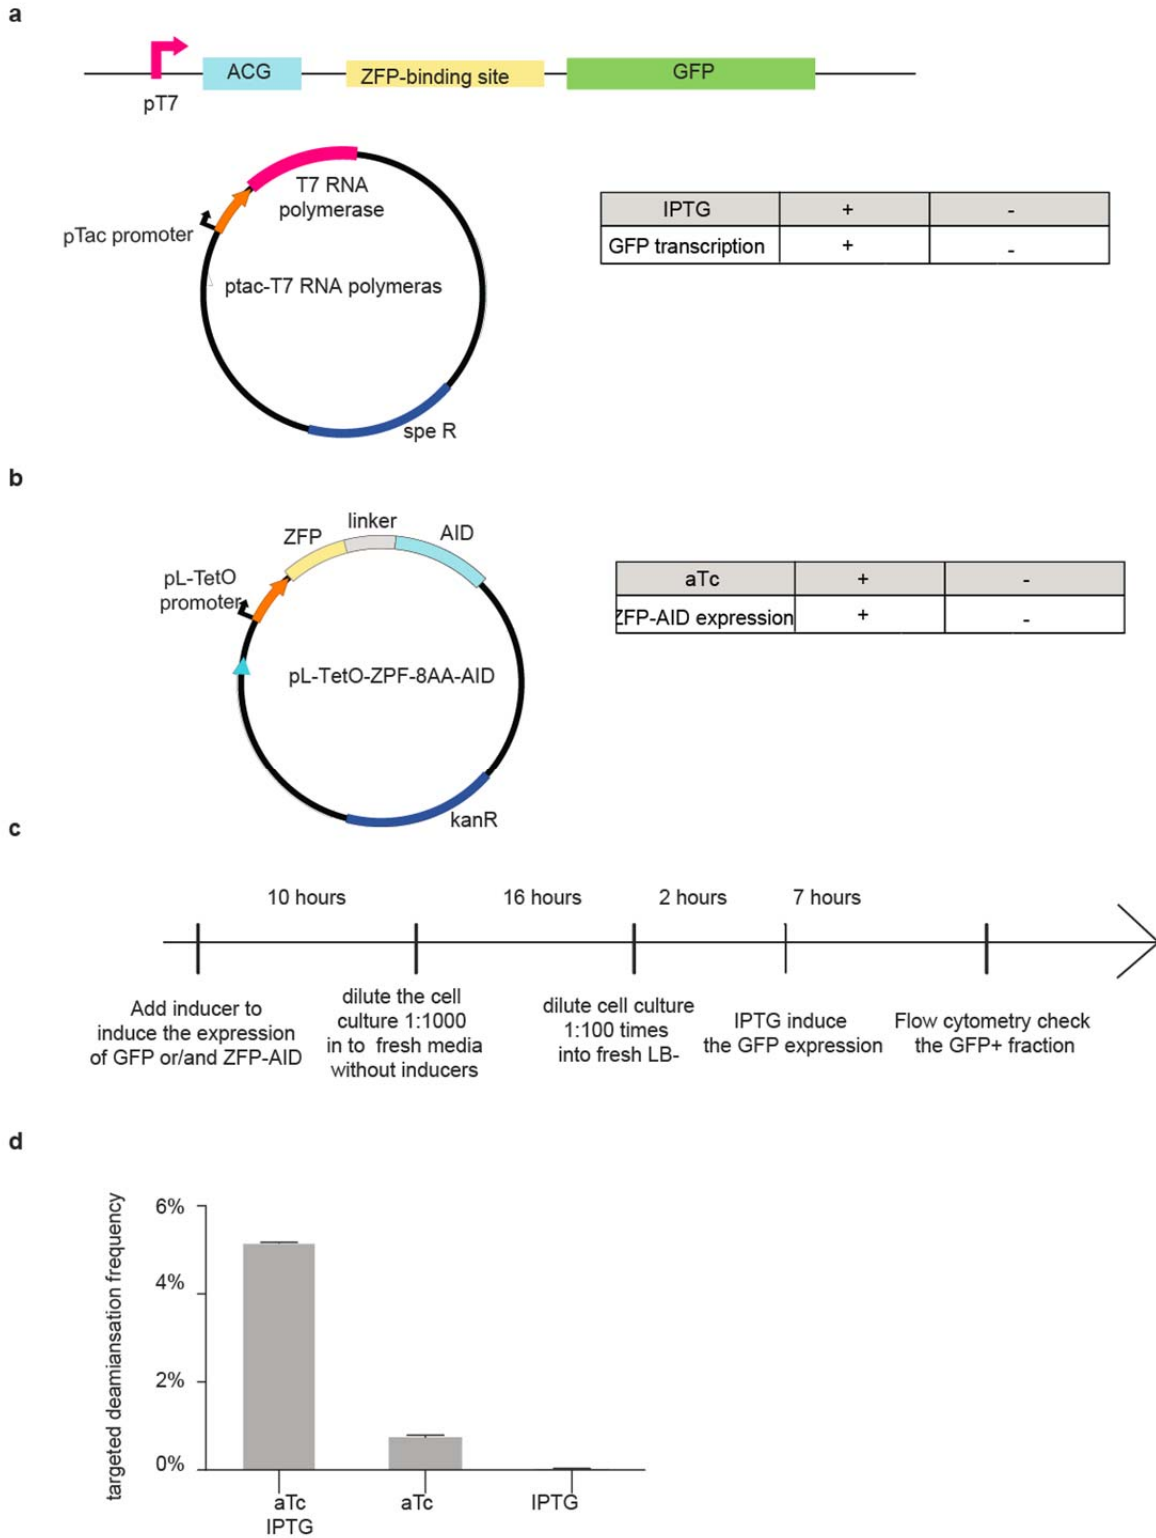

97

98 **Supplementary Figure 4** | Active transcription enhances targeted deamination. **a**, Schematic  
99 representation of the transcription control of the GFP reporter. This GFP was transcribed by T7  
100 RNA polymerase which is transcribed by an IPTG inducible promoter pTac. **b**, Schematic  
101 representation of the transcription control of ZF-AID. ZF-AID was transcribed from the pL-TetO  
102 promoter which was modulated by the TetR protein (constitutively expressed) and the inducer  
103 aTc. **c**, Time line depicting the experiment design. **d**, Targeted deamination frequency  
104 with/without GFP transcription. The bacterial culture was induced with IPTG, aTc and  
105 IPTG&aTC for 10 hours, and then diluted 1000-fold into fresh media without any inducer  
106 overnight. Cell culture was diluted again 100-fold into fresh media with IPTG to check for the  
107 expression of GFP. Targeted deamination frequency was quantified via percentage of GFP-  
108 positive cells in the population.

109

110

111

112

113

114

115

116

117

118

119

120

121

122

123

124

125

126

127



128 **Supplementary Figure 5**

129

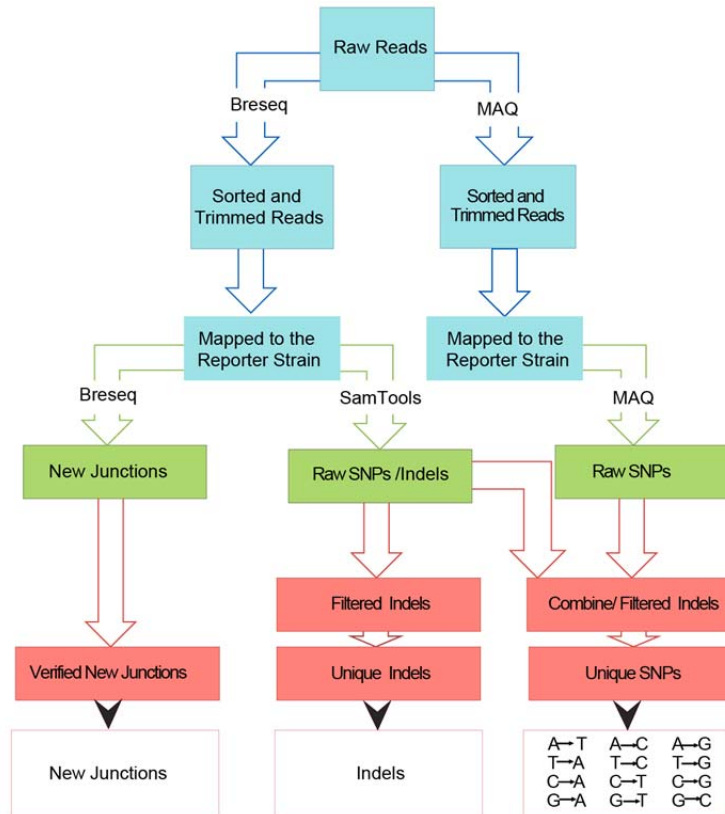

130

131

132 **Supplementary Figure 5** | Flow map of the whole-genome sequence data analysis. Breseq  
133 and MAQ were used independently to assign the raw reads to different strains and align the  
134 reads to the reference genomes. After alignment, we used Samtools and MAQ to identify single  
135 nucleotide substitutions (SNSs), Breseq to identify new genomic junctions and Samtools to call  
136 indels.

137

138

139

140

141

142

143 **Supplementary Figure 6**  
144

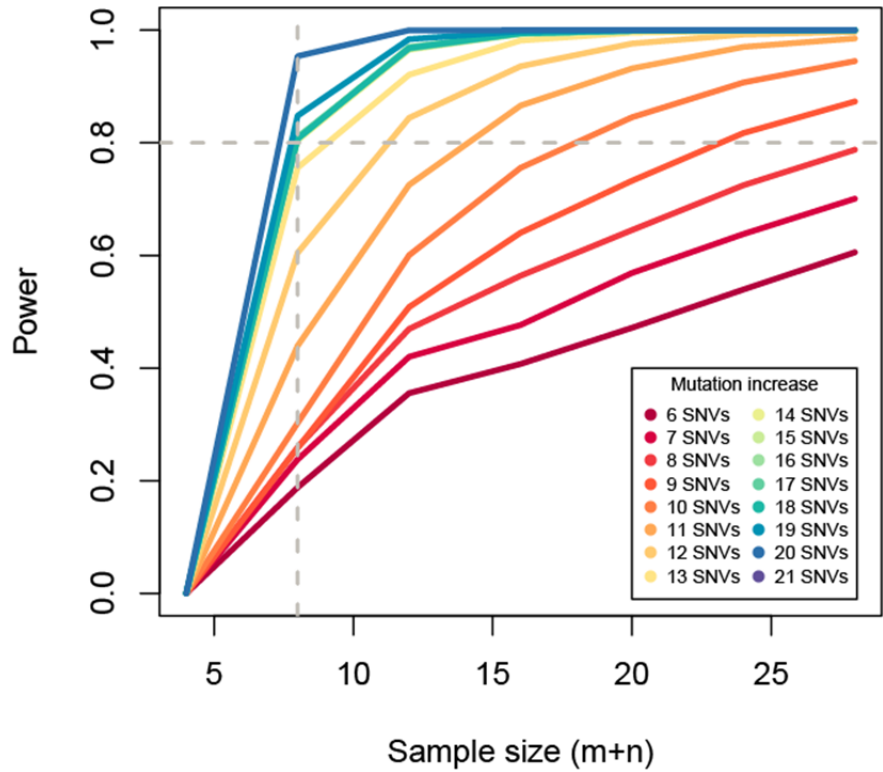

145  
146  
147 **Supplementary Figure 6** | Sensitivity simulations for the Wilcoxon test of numbers of genome  
148 SNV comparison  
149  
150

151 **Supplementary Figure 7**  
152

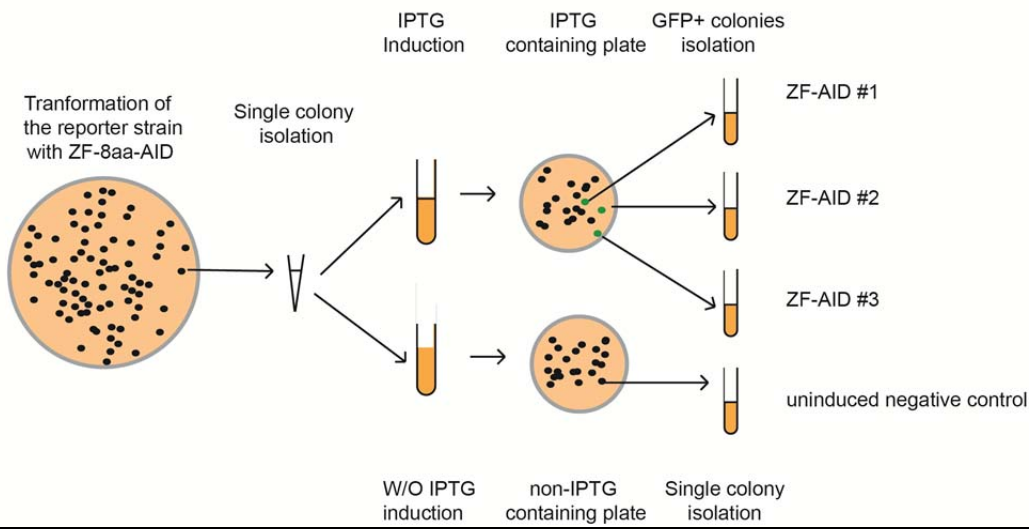

153  
154  
155 **Supplementary Figure 7 | Illustration of the whole-genome sequence library preparation.**

156  
157  
158  
159  
160  
161  
162  
163  
164  
165  
166  
167  
168  
169  
170  
171  
172  
173  
174  
175  
176  
177  
178  
179  
180  
181  
182  
183  
184

185  
186

**Supplementary Table 1**

Summary of the Next Generation Sequence Analysis of the *E.coli* strains induced with ZF-8aa-AID

| Strain                                 | negative |         | ZF-AID #1 |         | ZF-AID #2 |         | ZF-AID #3 |         |
|----------------------------------------|----------|---------|-----------|---------|-----------|---------|-----------|---------|
|                                        | Breseq   | MAQ     | Breseq    | MAQ     | Breseq    | MAQ     | Breseq    | MAQ     |
| Sorted Reads                           | 5297284  | 5168108 | 3409951   | 3504126 | 1886216   | 1933461 | 4373651   | 4256740 |
| Mapped to EcNR2                        | 5164973  | 4093566 | 3212263   | 3183401 | 1774630   | 1357434 | 4266413   | 2952749 |
| % mapped to the genome                 | 97.5%    | 79.2%   | 94.2%     | 91%     | 94.1%     | 70.2%   | 97.5%     | 69.4%   |
| Average coverage (X)                   | 92.7     |         | 55.3      |         | 30.9      |         | 73.8      |         |
| Total SNVs                             | 100      |         | 110       |         | 101       |         | 97        |         |
| Total single nucleotide substitutions  | 88       |         | 102       |         | 95        |         | 91        |         |
| Total Indels                           | 12       |         | 8         |         | 6         |         | 6         |         |
| Unique SNVs                            | 31       |         | 41        |         | 32        |         | 28        |         |
| Unique substitutions                   | 22       |         | 36        |         | 29        |         | 25        |         |
| Unique indels                          | 9        |         | 5         |         | 3         |         | 3         |         |
| A→T                                    | 0        |         | 0         |         | 0         |         | 0         |         |
| A→C                                    | 0        |         | 0         |         | 0         |         | 0         |         |
| A→G                                    | 1        |         | 2         |         | 3         |         | 4         |         |
| C→A                                    | 0        |         | 0         |         | 0         |         | 0         |         |
| C→T                                    | 7        |         | 18        |         | 10        |         | 12        |         |
| C→G                                    | 0        |         | 0         |         | 0         |         | 1         |         |
| G→A                                    | 11       |         | 15        |         | 15        |         | 7         |         |
| G→T                                    | 0        |         | 0         |         | 0         |         | 0         |         |
| G→C                                    | 0        |         | 0         |         | 0         |         | 0         |         |
| T→A                                    |          |         |           |         |           |         |           |         |
| T→C                                    | 3        |         | 1         |         | 1         |         | 1         |         |
| T→G                                    |          |         |           |         |           |         |           |         |
| C→T/G→A mutations in the WRC motif     | 9        |         | 25        |         | 15        |         | 15        |         |
| C→T/G→A mutations in the non-WRC motif | 9        |         | 13        |         | 9         |         | 14        |         |
| Other type of substitutions            | 4        |         | 3         |         | 4         |         | 6         |         |

187  
188  
189

190  
191

**Supplementary Table 2**

Summary of the Next Generation Sequence Analysis of the *E.coli* strains induced with TALE-C3-AID

| Strain                                 | negative |         | TALE-AID #1 |         | TALE-AID #2 |         | TALE-AID #3 |         |
|----------------------------------------|----------|---------|-------------|---------|-------------|---------|-------------|---------|
|                                        | Breseq   | MAQ     | Breseq      | MAQ     | Breseq      | MAQ     | Breseq      | MAQ     |
| Sorted Reads                           | 879775   | 1319162 | 3269195     | 4143893 | 3934097     | 3890959 | 2671258     | 2650878 |
| Mapped to EcNR2                        | 752217   | 633922  | 3218793     | 2425436 | 3720863     | 3574572 | 2605760     | 2522975 |
| % mapped to the genome                 | 85.5%    | 48.1%   | 98.5%       | 58.5%   | 94.6%       | 91.9%   | 97.5%       | 95.2%   |
| Average coverage (X)                   | 12.9     |         | 55.5        |         | 68.7        |         | 48.2        |         |
| Total SNVs                             | 106      |         | 119         |         | 106         |         | 118         |         |
| Total single nucleotide substitutions  | 99       |         | 110         |         | 99          |         | 111         |         |
| Total Indels                           | 7        |         | 9           |         | 7           |         | 7           |         |
| Unique SNVs                            | 21       |         | 34          |         | 21          |         | 33          |         |
| Unique substitutions                   | 18       |         | 29          |         | 18          |         | 30          |         |
| Unique indels                          | 3        |         | 5           |         | 3           |         | 3           |         |
| A→T                                    | 0        |         | 0           |         | 0           |         | 0           |         |
| A→C                                    | 0        |         | 0           |         | 1           |         | 0           |         |
| A→G                                    | 1        |         | 0           |         | 3           |         | 0           |         |
| C→A                                    | 0        |         | 0           |         | 0           |         | 0           |         |
| C→T                                    | 5        |         | 15          |         | 4           |         | 12          |         |
| C→G                                    | 0        |         | 0           |         | 0           |         | 0           |         |
| G→A                                    | 7        |         | 11          |         | 7           |         | 14          |         |
| G→T                                    | 0        |         | 0           |         | 1           |         | 0           |         |
| G→C                                    | 0        |         | 0           |         | 0           |         | 0           |         |
| T→A                                    | 0        |         | 0           |         | 0           |         | 0           |         |
| T→C                                    | 5        |         | 3           |         | 2           |         | 4           |         |
| T→G                                    | 0        |         | 0           |         | 0           |         | 0           |         |
| C→T/G→A mutations in the WRC motif     | 9        |         | 13          |         | 9           |         | 14          |         |
| C→T/G→A mutations in the non-WRC motif | 3        |         | 13          |         | 2           |         | 12          |         |
| Other type of substitutions            | 6        |         | 3           |         | 7           |         | 4           |         |

192  
193

194  
195  
196  
197  
198  
199  
200  
201  
202  
203  
204  
205  
206  
207  
208  
209  
210  
211  
212  
213  
214  
215  
216  
217  
218  
219  
220  
221  
222  
223  
224  
225  
226  
227  
228  
229  
230  
231  
232  
233  
234  
235  
236  
237  
238  
239  
240  
241  
242  
243  
244  
245  
246  
247  
248  
249  
250  
251  
252

**Supplementary Note 1**

**ZF -AID constructs and the PCR primer sequences**

ZF coding sequence is capitalized, linker sequence is highlighted in green, AID coding sequence is un-capitalized. NheI cutting site is labeled in Red, HindIII cutting site is labeled in Blue.

ZF -4aa-AID:

GCTAGCCCCAGAGTGAGAACC GGTTCTAAGACACCTCCCCACGAGAGGCCCTTTTCAGTGTAGAATTTGTATGCGTAATTTTTTC  
TAGGTCCGATGTGCTGGCCAATCACACAAGGACTCACACTGGTGAAAAGCCCTTCCAATGTAGAATTTGTATGCGCAATTTTT  
CTCAATCTTCTACTCTGACTAGACATCTGAGGACCCACACAGGCCGAAAAGCCCTTCCAGTGCAGAAATTTGTATGAGAAATTTT  
TCTGAAAGACAGGGTCTGAAAAGACATCTGAAGACACATACAGGTGAAAAGGATCCGGTGGTGGTCTGacagcctcttgat  
gaaccggaggaagtttctttaccaattcaaaaatgtccgctgggctaagggctcggcgtgagacctacctgtgctacgtagtga  
agaggcgtgacagtgtacatcctttcactggactttgggtatcttcgcaataagaacggctgccacgtggaattgctcttc  
ctccgctacatctcggactgggacctagaccctggcgcgtgctaccgcgtcacctggttcacctcctggagccctgctacga  
ctgtgccgcacatgtggcgcactttctgcgagggaaocccaacctcagtctgaggatcttcaccgcgcgcctctacttctgtg  
aggaccgcaaggctgagcccaggggctgcggcgcgtgcaccgcgcgggggtgcaaatagccatcatgaccttcaagattat  
tttactgctggaataacttttgtagaaaaccacgaaagaactttcaagcctgggaagggtgcatgaaaattcagttcgtct  
ctccagacagcttcggcgcacatcctttgcccctgtatgaggttgatgacttacgagacgcatttcgtactttgggactt

ZF -4aa2-AID:

GCTAGCCCCAGAGTGAGAACC GGTTCTAAGACACCTCCCCACGAGAGGCCCTTTTCAGTGTAGAATTTGTATGCGTAATTTTTTC  
TAGGTCCGATGTGCTGGCCAATCACACAAGGACTCACACTGGTGAAAAGCCCTTCCAATGTAGAATTTGTATGCGCAATTTTT  
CTCAATCTTCTACTCTGACTAGACATCTGAGGACCCACACAGGCCGAAAAGCCCTTCCAGTGCAGAAATTTGTATGAGAAATTTT  
TCTGAAAGACAGGGTCTGAAAAGACATCTGAAGACACATACAGGTGAAAAGGATCCGTGCGTGGTCTGacagcctcttgat  
gaaccggaggaagtttctttaccaattcaaaaatgtccgctgggctaagggctcggcgtgagacctacctgtgctacgtagtga  
agaggcgtgacagtgtacatcctttcactggactttgggtatcttcgcaataagaacggctgccacgtggaattgctcttc  
ctccgctacatctcggactgggacctagaccctggcgcgtgctaccgcgtcacctggttcacctcctggagccctgctacga  
ctgtgccgcacatgtggcgcactttctgcgagggaaocccaacctcagtctgaggatcttcaccgcgcgcctctacttctgtg  
aggaccgcaaggctgagcccaggggctgcggcgcgtgcaccgcgcgggggtgcaaatagccatcatgaccttcaagattat  
tttactgctggaataacttttgtagaaaaccacgaaagaactttcaagcctgggaagggtgcatgaaaattcagttcgtct  
ctccagacagcttcggcgcacatcctttgcccctgtatgaggttgatgacttacgagacgcatttcgtactttgggactt

ZF-8AA-AID

GCTAGCCCCAGAGTGAGAACC GGTTCTAAGACACCTCCCCACGAGAGGCCCTTTTCAGTGTAGAATTTGTATGCGTAATTTTTTC  
TAGGTCCGATGTGCTGGCCAATCACACAAGGACTCACACTGGTGAAAAGCCCTTCCAATGTAGAATTTGTATGCGCAATTTTT  
CTCAATCTTCTACTCTGACTAGACATCTGAGGACCCACACAGGCCGAAAAGCCCTTCCAGTGCAGAAATTTGTATGAGAAATTTT  
TCTGAAAGACAGGGTCTGAAAAGACATCTGAAGACACATACAGGTGAAAAGGATCCCTGGTGGTGGTCTGGGGTCCGACTga  
cagcctcttgatgaaccggaggaagtttctttaccaattcaaaaatgtccgctgggctaagggctcggcgtgagacctacctgt  
gctacgtagtgaagaggcgtgacagtgtacatcctttcactggactttgggtatcttcgcaataagaacggctgccacgtg  
gaattgctcttctccgctacatctcggactgggacctagaccctggcgcgtgctaccgcgtcacctggttcacctcctggag  
cccctgctacgactgtgcccgacatgtggcgcactttctgcgagggaaocccaacctcagtctgaggatcttcaccgcgcgc  
tctacttctgtgaggaccgcaaggctgagcccaggggctgcggcgcgtgcaccgcgcgggggtgcaaatagccatcatgacc  
ttcaagattattttactgctggaataacttttgtagaaaaccacgaaagaactttcaagcctgggaagggtgcatgaaaa  
ttcagttcgtctctccagacagcttcggcgcacatcctttgcccctgtatgaggttgatgacttacgagacgcatttcgtactt  
tgggactt

ZF-11AA-AID:

GGTTCTGGTGGTGGTGGTTCTGGTGGTGGTGGTGCTAGCCCCAGAGTGAGAACC GGTTCTAAGACACCTCCCCACGAGAGGCC  
TTTTTCAGTGTAGAATTTGTATGCGTAATTTTTCTAGGTCCGATGTGCTGGCCAATCACACAAGGACTCACACTGGTGAAAAGC  
CCTTCCAATGTAGAATTTGTATGCGCAATTTTTCTCAATCTTCTACTCTGACTAGACATCTGAGGACCCACACAGGCCGAAAAG  
CCTTCCAGTGCAGAAATTTGTATGAGAAATTTTTCTGAAAGACAGGGTCTGAAAAGACATCTGAAGACACATACAGGTGAAA  
AGGATCCGGTTCTGGTGGTGGTGGTGGTGGTGGTGGTgacagcctcttgatgaaccggaggaagtttctttaccaattca  
aaaatgtccgctgggctaagggctcggcgtgagacctacctgtgctacgtagtgaagaggcgtgacagtgtacatccttttca

253 ctggactttggttatcttcgcaataagaacggctgccacgtggaattgctcttctcogctacatctcggactgggacctaga  
 254 ccctggcogctgctaccgcgtcacctggttcacctcctggagccctgctacgactgtgcccacatgtggccgactttctgc  
 255 gaggaaccccaacctcagctctgaggatcttcaccgcgcctctacttctgtgaggaccgcaaggctgagcccaggggctg  
 256 cggcggtgcaccgcgcgggggtgcaaatagccatcatgaccttcaaagattatctttactgctggaatactttttagaaaa  
 257 ccacgaaagaacttcaaagcctggaagggctgcatgaaaattcagttcgtctctccagacagcttcggcgcacacctttg  
 258 ccctgtatgaggtgatgacttacgagacgcatctcgtactttgggactt

259  
260  
261

**Primers for ZF-AID constructs**

|             |                                                                    |
|-------------|--------------------------------------------------------------------|
| ZFP-F       | ATCGGCTAGC CCCAGAGTGAGA ACCGGT                                     |
| ZFP-R-4AA   | ccggttcatcaagaggtgtc <b>AGAACCACCACC</b> GGATCCTTTTTACCTGTATG      |
| ZFP-R-4AA2  | ccggttcatcaagaggtgtc <b>AGAACCACGCAC</b> GGATCCTTTTTACCTGTATG      |
| ZFP-R-8AA   | ctgtc <b>AGTCGACCCAGACCACCACCAGA</b> GGATCCTTTTTACCTGTATG          |
| ZFP-R-11AA  | gtc <b>ACCACCACCACCAGAACCACCACCACCAGAACC</b> GGATCCTTTTTACCTGTATG  |
| ZFP-R-Hind3 | atcgaagctt GGATCCTTTTTACCTGTATG                                    |
| AID-F-Nhe1  | ATCGGCTAGC gacagcctcttgatgaaccg                                    |
| AID-F-4AA   | TACAGGTGAAAAGGATCC <b>GGTGGTGGTTCT</b> gacagcctcttgatgaaccg        |
| AID-F-4AA2  | TACAGGTGAAAAGGATCC <b>CTGCGTGGTTCT</b> gacagcctcttgatgaaccg        |
| AID-F-8AA   | AGGATCC <b>TCTGGTGGTGGTCTGGGGTCTGACT</b> gacagcctcttgatgaaccg      |
| AID-F-11AA  | GATCC <b>GGTTCTGGTGGTGGTGGTCTGGTGGTGGTGGT</b> gacagcctcttgatgaaccg |
| AID-R       | atcgaagctt aaagccttcaagctacgaaatgcg                                |

262  
263

**Supplementary Note 2**

**TALE-AID constructs and the PCR primer sequences**

264  
265  
266  
267 **TALE-AID full sequence:** TALE N-terminus is in **Blue**, TALE central repeating domain is in  
 268 **Red**, TALE-C terminus is in **Green**. Linker sequence is in **Brown**. AID coding sequence is  
 269 un-capitalized in **Black**.

270  
271  
272  
273  
274  
275  
276  
277  
278  
279  
280  
281  
282  
283  
284  
285  
286  
287  
288  
289  
290  
291  
292  
293  
294  
295  
296  
297  
298  
299

ATGTGCGGGACCCGGCTCCCTTCCCCACCCGACCCAGCCAGCGTTTTGCGCCGACTCGTTCTCAGACCTGCTTAGGCAGTT  
 CGACCCTCACTGTTTAAACACATCGTTGTTTCGACTCCCTTCTCGGTTTGGGGCGCACCATACGGAGGCGGCCACCGGGAGT  
 GGGATGAGGTGCAGTCGGGATTGAGAGCTGCGGATGCACCACCCCAACCATGCGGGTGGCCGTACCCGCTGCCGACCCGCG  
 AGGGCGAAGCCCGCACCAAGGCGGAGGGCAGCGCAACCGTCCGACGCAAGCCCCGAGCGCAAGTAGATTTGAGAACTTTGGG  
 ATATTCACAGCAGCAGCAGGAAAAGATCAAGCCCAAAGTGAAGTGCAGTTCGCGCAGCATCACGAAGCGCTGGTGGGTTCATG  
 GGTTTACACATGCCACATCGTAGCCTTGTGCGCAGCACCTGCGAGCCCTTGGCAGCGTCCCGTCAAGTACCAGGACATGATT  
 GCGGCGTTGCGGGAAGCCACATGAGGCGATCGTCCGGTGTGGGGAAAACAGTGGAGCGGAGCCCGAGCGCTTGGGCCCTGTT  
 GACGGTTCGCGGAGAGCTGAGAGGGCTCCCTTCACTGGACACGGCCAGTTGCTGAAGATCGCGAAGCGGGGAGGAGTCA  
 CGGCGTTCGAGGCGGTGCACGCGTGGCCCAATGCGCTCACGGGAGCACCCCTCAACTGACCCCAAGCAGGTCTGGCAATC  
 GCCTCCAACATTGGCGGAAAACAGGCACTCGAGACTGTCCAGCGCTGCTTCCCGTGCTGTGCCAAGCGCACGGACTCACCCC  
 AGAGCAGGTCTGGCGATCGCAAGCCACGACGGAGGAAAGCAAGCCTTGGAAACAGTACAGAGGCTGTGCTGTGCTGTGCC  
 AAGCGCACGGCTCACCCAGAGCAGGTCTGGCAATCGCGAGCAATAACGGCGGAAAACAGGCTTGGAAACGGTGCAGAGG  
 CTCCTTCCAGTGCTGTGCCAAGCGCACGGATTAACCCAGAGCAGGTCTGGCAATCGCCTCCAACATTGGCGGGAAAACAGGC  
 ACTCGAGACTGTCCAGCGCCTGCTTCCCGTGTGTGCCAAGCGCACGGCTTAACCCAGAGCAGGTCTGGCGATCGCAAGCC  
 ACGAGGAGGAAAAGCAAGCCTTGGAAAACAGTACAGAGGCTTGTGCTGTGCTGTGCCAAGCGCACGGACTTACCCAGAGCAG  
 GTCGTGGCCATTGCCCTCGAATGGAGGGGGCAAACAGGCGTGGAAACCGTACAACGATTGCTGCCGCTGTGTGCCAAGCGCA  
 CGGCTTACCCAGAGCAGGTCTGGCGATCGCAAGCCACGACGGAGGAAAGCAAGCCTTGGAAACAGTACAGAGGCTGTGTC  
 CTGTGCTGTGCCAAGCGCACGGACTAACCCAGAGCAGGTCTGGCAATCGCCTCCAACATTGGCGGGAAAACAGGCACTCGAG  
 ACTGTCCAGCGCCTGCTTCCCGTGTGTGCCAAGCGCACGGGCTACCCCAAGCAGGTCTGGCGATCGCAAGCCACGACGG  
 AGGAAAAGCAAGCCTTGGAAAACAGTACAGAGGCTTGTGCTGTGCTGTGCCAAGCGCACGGGCTAACCCAGAGCAGGTCTGG  
 CCATTGCTCGAATGGAGGGGGCAAACAGGCGTGGAAAACCGTACAACGATTGCTGCCGCTGTGTGCCAAGCGCACGGGCTA  
 ACCCAGAGCAGGTCTGGCAATCGCCTCCAACATTGGCGGAAAACAGGCACTCGAGACTGTCCAGCGCCTGCTTCCCGTCT  
 GTGCCAAGCGCACGGTTAACCCAGAGCAGGTCTGGCCATTGCCCTCGAATGGAGGGGGCAAACAGGCGTGGAAAACCGTAC  
 AACGATTGCTGCCGCTGTGTGCCAAGCGCACGGACTCACGCTGAGCAGGTAGTGGCTATTGCATCCAATATCGGGGGCAGA  
 CCCGCACTGGAGTCAATCGTGGCCAGCTTTTCGAGCCGGACCCCGGCTGGCCGCACTCACTAATGATCATCTTGTAGCGCT  
 GGCCTGCCCTCGGCGGACGACCCGCTTGGATGCGGTGAAGAAGGGGCTCCCGCACGCGCCTGCATTGATTAAGCGGACCAACA  
 GAAGGATTCCCGAGAGGACATCACATCGAGTGGCAGATCACGCGCAAGTGGTCCGCGTGTCCGATTCTTCCAGTGTCACTCC  
 CACCCCGCACAAAGCGTTCGATGACGCCATGACTCAATTTGGTATGTGAGACACGGACTGCTGCAGCTCTTTCGTAGAGTCCG  
 TGTACAGAACTCGAGGCCGCTCGGACACTGCCTCCCGCCTCCAGCGGTGGACAGGATTTCCAAGCGAGCGGTATGA

300 AACGCGGAAGCCTTACCTACGTCAACTCAGACACCTGACCAGGCGAGCCTTCATGCGTTCGCAGACTCGCTGGAGAGGGAT  
 301 TTGGACGCGCCCTCGCCATGCATGAAGGGGACCAAACTCGCGCGTCAGCTAGCCCAAGAAGAGAGAAAGGTGGAGGCCAG  
 302 Cgacagcctcttgatgaaccggaggaagtcttcttaccattcaaaaatgtccgctgggctaagggctggcgctgagacctacc  
 303 tgtgctacgtagtgaagaggcgtgacagtgtacatccttttactggactttgggtatcttcgcaataagaacggctgccac  
 304 gtggaattgctcttctcgcgtacatctcggactgggacctagacctggccgctgctaccgctcacctggttcacctcctg  
 305 gagccctgctacgactgtgccccacatgtggccgactttctgcgaggggaacccaacctcagtctgaggatcttcaccgctg  
 306 gcctctacttctgtgaggaccgcaaggctgagccccaggggctgcccggctgcaccgctgggggtgcaaatagccatcatg  
 307 acctcaagattatcttactgctggaatactttgtagaaaaccacgaaagaactttcaagcctgggaagggtgcatga  
 308 aaattcagttcgtctctocagacagcttcggcgcatcctttgcccctgtatgaggttgatgacttacgagacgcatctcgta  
 309 ctttgggactttga

310  
311  
312

**Primer sequences**

|             |                                                                                                                                 |
|-------------|---------------------------------------------------------------------------------------------------------------------------------|
| TAL-F-ssp1  | TGGCAAATATTCTGAAATGAGCTGTTGACAATTAATCATCCGGTCCGTATAAATCTGTGGAAT<br>TGTGAGCGGATAACAATTTACACAAAGAGGAGAAAGGTACCATGTGCGGACCCGGCTCCC |
| TAL-C1-Nhe1 | TGGGGCTAGCTGACGCGCGAGTTTGGTCCC                                                                                                  |
| TAL-C2-Nhe1 | TCTTGGGGCTAGCGCGGAGGCAGTGTGCCGA                                                                                                 |
| TAL-C3-Nhe1 | TCTTGGGGCTAGCTGCCACTCGATGTGATGTCTCTCGGGAATCCT                                                                                   |
| TAL-C4-Nhe1 | TCTTGGGGCTAGCGCGGCCAGCGCGGGTCCC                                                                                                 |
| TAL-C5-Nhe1 | TCTTGGGGCTAGCCTCCAGTGCAGGTCTGCC                                                                                                 |
| AID-R       | atcgaagctaaagtcccaagtacgaaatgcg                                                                                                 |

313  
314  
315

**Supplementary Note 3**

**APOBECs and PCR primer sequences**

316  
317  
318

**APOBEC1 sequence:**

319 ACTTCTGAAAAAGGTCCATCTACTGGTGATCCTACTCTGCGTCTGTCGATTGAACCGTGGGAATTTGACGTGTTCTACGACCC  
 320 ACGCGAAGTGCCTAAAGAGGCTTGCCCTGCTGTACGAAATCAAATGGGGTATGTCTCGCAAAATTTGGCGCTCCAGCGGTAAAA  
 321 ACACCACTAACACGTTGAAGTCACTTTCATCAAAAAGTTACCTCTGAACGCGACTTCCACCCGTCATGTCTTGTCTATC  
 322 ACCTGGTTCCTGTCTTGGAGCCCGTGTGGGAGTGCTCCAAGCCATCCGCGAATTCCTGTCTCGTCAACCCGGGTGTAACGCT  
 323 GGTGATCTATGTGCGCCGTCTGTTCTGGCATATGGATCAGCAAAACCGTCAGGGTCTGCGTGATCTGGTGAACAGCGCGCTCA  
 324 CGATCCAGATCATGCGTGCATCCGAATATTACCATTTGCTGGCGTAACTTCGTAACCTACCCTCCGGGTGATGAAGCGCACTGG  
 325 CCGCAATACCCGCGCTGTGGATGATGCTGTACGCTCTGGAGCTGCATTGCATCATCCTGTCTCTGCCACCGTGCCTGAAAAAT  
 326 TTCCCGCGTTGGCAGAACCATCTGACCTTCTCCGCTCTGCATCTGCAGAACTGTCACTACCAGACTATCCCGCTCACATCC  
 327 TGCTGGCTACTGGCTGATCCATCCGCTCTGTTGGTGGCGC

328  
329

**APOBEC3F sequence**

330 AAACCGCATTTTCGTAACACCGTTGAGCGTATGTATCGTGACACTTCTCTTACAACCTTCTACAACCGTCCGATCCTGTCTCG  
 331 CCGCAACACCGTGTGGCTGTGTTATGAAGTTAAAAACAAAGGCCGCTCTCGTCCGCTCTGGACCGGAAGATCTTCCGTGGCC  
 332 AGGTACCGCTTCTTTATTCTGTCGCCGTTTCAGGTGCTGTCTAGCCCGTTCGGCCAGTGTGCACCGCCGACGGTACGGCC  
 333 CAGTTCAATGGCCTCCGAGCTGACTGCCGTCGCGAGCAGGGTCTGCC

334  
335

**APOBEC3G 2K3A sequence**

336 GAAATCTGCGTCACTCTATGGACCCGCCAACTTTTACTTTCAACTTCAACAATGAACCGTGGGTCCGTGGCCGTCACGAGAC  
 337 TTACCTGTGCTACGAGGTGGAGCGTATGCACAATGATACCTGGGTGAAACTGAACAGCGTCCGCGTTTCTGGCTAACAGG  
 338 CTCCTCCACAAACACGGCTTCTTGGAGGCGGTACGCTGAACCTGTGCTTCTGGATGTTATTCTTTCTGGAAACTGGACCTG  
 339 GACCAAGATTATCGTGAACCTTGCCTCACTAGCTGGAGCCCATGCTTCAGCTGCGCACAGGAAATGGCCAAGTTCATTTCTAA  
 340 AAACAAACATGTTTCTCTGTGTATCAAGACTGCTCGCATCTATGATGACCAGGCGGTGCTCAGGAAGGCCTGCGTACTCTGG  
 341 CGGAAGCAGGTGCTAAAATTAGCATCATGACTTACAGCGAATTCAAACACTGCTGGGACACCTTCTGGACCACAGGGTGGC  
 342 CCTTCCAGCCTTGGGATGGTCTGGATGAACACTCTCAGGACCTGTCTGGTCTGCGTGCATCCTGCAGAACAGGAAAA  
 343 T

344  
345  
346

**Primers for ZF-APOBECs constructs**



347 Homology to the vectors is in Black; linker sequence is highlighted in **Green** and the  
 348 homology to the APOBECs sequences is in Red.  
 349

|                  |                                                                                        |
|------------------|----------------------------------------------------------------------------------------|
| APOBEC1-F-4AA1   | GAAAAGACATCTGAAGACACATACAGGTGAAAAAGGATCCGGTGGTGGTTCTACTTCTGAAA<br>AAGGTCCATCTAC        |
| APOBEC1-reverse  | CCATGGGATCCCCGGGCTGCAGGAATTCGATATCAAGCTTTCAGCGCCACGCAACAGAC                            |
| APOBEC3F-F-4AA1  | GAAAAGACATCTGAAGACACATACAGGTGAAAAAGGATCCGGTGGTGGTTCT<br>AAACCGCATTTTCGTAAACACCGTTGAGCG |
| APOBEC3F-reverse | CCATGGGATCCCCGGGCTGCAGGAATTCGATATCAAGCTTTCAGCGACGACCCTGCTCGC                           |
| APOBEC3G-F-4AA1  | GAAAAGACATCTGAAGACACATACAGGTGAAAAAGGATCCGGTGGTGGTTCT<br>GAAATTCTGCGTCACTCTATGGAC       |
| APOBEC3G-reverse | CCATGGGATCCCCGGGCTGCAGGAATTCGATATCAAGCTTTCATTTTCCTGGTTCTGC                             |

350  
 351 Primers for TALE-APOBECs construct

352 NheI cutting site is in **Red** and HindIII cutting site is in the **Blue**.  
 353

|             |                                                                          |
|-------------|--------------------------------------------------------------------------|
| APOBEC1-F   | ATCGGCTAGCCCCAAGAAGAAGAGAAAGGTGGAGGCCAGCACTTCTGAAAAAGGTCCATCTA<br>CTGGTG |
| APOBEC1-R   | ATCGAAGCTTTCAGCGCCACGCAACAGACGGATGG                                      |
| APOBEC3F-F  | ATCGGCTAGCCCCAAGAAGAAGAGAAAGGTGGAGGCCAGCAAACCGCATTTTCGTAACACCG<br>TTGAG  |
| APOBEC3F-R  | ATCGAAGCTTTCAGCGACGACCCTGCTCGCGACCG                                      |
| APOBEC-3G-F | ATCGGCTAGCCCCAAGAAGAAGAGAAAGGTGGAGGCCAGCGAAATTCGCGTCACTCTATG             |
| APOBEC-3G-R | ATCGAAGCTTTCATTTTCCTGGTTCTGCAGGATCG                                      |

354  
 355 **Supplementary Note 4**  
 356

357 **pTrc-Kan backbone sequence**

358 CTCGAGGTGGTGAATGTGAAACCAGTAAACGTTATACGATGTTCGAGAGTATGCCGGTGTCTCTTATCAGACCGTTTCCGCGT  
 359 GGTGAACCAGGCCAGCCACGTTTTCTGCGAAAACCGGGAAAAAGTGAAGCGCGGATGGCGGAGCTGAATTACATTTCCCAACC  
 360 GCGTGCACAACAACCTGGCGGGCAAACAGTCGTTGCTGATTGGCGTTGCCACCTCCAGTCTGGCCCTGCACGCGCGTTCGCAA  
 361 ATTGTTCGCGCGGATTAATCTCGCGCCGATCAACTGGGTGCCAGCGTGGTGGTGTTCGATGGTAGAACGAAGCGGCGTTCGAAGC  
 362 TGTAAAGCGGCGGTGCACAATCTTCTCGCGCAACGCGTCAGTGGGTGATCATTAACTATCCGTGGATGACCCAGGATGCCA  
 363 TTGCTGTGGAAGCTGCCTGCACATAATGTTCCGGCGTTATTTCTTGATGTCTCTGACCAGACCCATCAACAGTATATTTTTT  
 364 TCCCATGAAGACGGTACGCGACTGGGCGTGGAGCATCTGGTTCGCAATTTGGGTACCCAGCAAATCGCGCTGTTAGCGGGCCATT  
 365 AAGTTCGTCTCGGCGCGTCTGCGTCTGGCTGGCTGGCATAAATATCTCACTCGCAATCAAATTCAGCCGATAGCGGAACGGG  
 366 AAGCGACTGGAGTGCCATGTCCGTTTTCACAAACCATGCAAATGCTGAATGAGGGCATCGTTCCCACTGCGATGCTGGTT  
 367 GCCAACGATCAGATGGCGCTGGGCGCAATGCGCGCCATTACCGAGTCCGGGCTGCGCGTTGGTGGGATATCTCGGTAGTGGG  
 368 ATACGACGATACCGAAGACAGCTCATGTTATATCCCGCGTTAACCACCATCAAACAGGATTTTCGCTGCTGGGGCAAACCA  
 369 CCGTGGACCGCTTGTGCAACTCTCAGGGCCAGCGGTGAAGGGCAATCAGCTGTTGCCCCTCACTGGTGAAAAGAAAA  
 370 ACCACCTGGCACCATAACGCAAACCGCCTCTCCCGCGTTGGCCGATTCATTAATGCAGCTGGCACGACAGGTTTCCCG  
 371 ACTGAAAAGCGGGCAGTGAGCGCAACGCAATTAATGTGAGTTAGCGCAATTGATCTGGTTTGACAGCTTATCATCGACTGCA  
 372 CGGTGCACCAATGCTTCTGGCGTCAAGCAGCCATCGAAGCTGTGGTATGGCTGTGCAGGTCGTAATCACTGCATAATTCGT  
 373 GTCGCTCAAGGCGCACTCCCGTTCTGGATAATGTTTTTTCGCGGCACATCATAACGGTTCTGGCAAATATTCTGAAATGAGCT  
 374 GTTGACAATTAATCATCCGGTCCGTATAATCTGTGGAATTGTGAGCGGATAACAATTTACACAGGAAAACAGACCATGTGCTA  
 375 CTACCATCACCATCACCATCAGATTACGATATCCCAACGACCGAAAACTGTATTTTCAGGGCGCGCTAGCCCCAGCGACT  
 376 AAGCTTGATATCGAATTCCTGCAGCCCGGGGATCCATGGTACGCGTGTAGAGGCATCAAATAAAACGAAAGGCTCAGTCG  
 377 AAAGACTGGGCTTTTCGTTTTATCTGTTGTTTGTTCGGTGAACGCTCTCCTGAGTAGGACAAATCCGCGCCCTAGACCTAGGG  
 378 CGTTCGGCTGCGGCGAGCGGTATCAGCTCACTCAAAGGCGGTAATACGGTTATCCACAGAATCAGGGGATAACGCAGGAAAGA  
 379 ACATGTGAGCAAAAGGCCAGCAAAAGGCCAGGAACCGTAAAAAGGCCGCTGCTGGCGTTTTTCCATAGGCTCCGCCCCCT  
 380 GACGAGCATCAAAAATCGACGCTCAAGTCAGAGGTGGCGAAACCCGACAGGACTATAAAGATACAGGCGTTTTCCCCCTGG  
 381 AAGTCCCTCGTGCCTCTCCTGTTCCGACCCCTGCGCTTACCGGATACCTGTCCGCTTTCTCCCTTCGGGAAGCGTGGCGC  
 382 TTTCTCATAGCTCAGCTGTAGTATCTCAGTTCGGTGTAGGTCGTTGCTCCAAGCTGGGCTGTGTGCACGAACCCCCGTT  
 383 CAGCCGACCGCTGCGCCTTATCCGGTAACATCTGTTGAGTCCAACCCGTTAAGACACGACTTATCGCCACTGGCAGCAGC  
 384 CACTGGTAAACAGGATTAGCAGAGCGAGGTATGTAGCGGTGCTACAGAGTTCTTGAAGTGGTGGCTAACTACGGCTACACTA  
 385 GAAGGACAGTATTTGGTATCTGCGCTCTGCTGAAGCCAGTTACCTTCGAAAAAGAGTTGGTAGCTCTTGATCCGGCAAACAA  
 386 ACCACCGCTGGTAGCGGTGGTTTTTTTGTGTTGCAAGCAGCAGATTACGCGCAGAAAAAAGGATCTCAAGAAGATCCTTTGAT  
 387 CTTTTCTACGGGGTCTGACGCTCAGTGGAAACGAAAACCTACGTTAAGGGATTTTGGTTCATGACTAGTGCTTGGATTCTACCA  
 388 ATAAAAACGCCCCGGCGCAACCGAGCGTTCTGAACAAATCCAGATGGAGTTCTGAGGTCATTACTGGATCTATCAACAGGAG

389 TCCAAGCGAGCTCTCGAACCCAGAGTCCCCTCAGAAGAAGCTCGTCAAGAAGGCGATAGAAGGCGATGCGCTGCGAATCGGG  
 390 AGCGGCGATACCGTAAAGCACGAGGAAGCGGTCCAGCCATTTCGCCCAAGCTCTCAGCAATATCACGGGTAGCCAACGCTA  
 391 TGTCCTGATAGCGGTCCGCCACACCCAGCCGGCCACAGTCGATGAATCCAGAAAAGCGGCCATTTTCCACCATGATATTCGGC  
 392 AAGCAGGCATCGCCATGGGTACGACGAGATCCTCGCCGTCCGGCATGCGCGCCTTGAGCCTGGCGAACAGTTCGGCTGGCGC  
 393 GAGCCCTGATGCTCTCGTCCAGATCATCCTGATCGACAAGACCGGCTTCCATCCGAGTACGTGCTCGCTCGATGCGATGTT  
 394 TCGCTTGGTGGTGAATGGGCAGGTAGCCGGATCAAGCGTATGCAGCCGCGCATTCGATCAGCCATGATGGATACTTTCTCG  
 395 GCAGGAGCAAGGTGAGATGACAGGAGATCCTGCCCCGGCACTTCGCCCAATAGCAGCCAGTCCCTTCCCGCTTCAGTGACAAC  
 396 GTCGAGCACAGCTGCGCAAGGAACGCCCGTTCGTGGCCAGCCACGATAGCCGCGCTGCCTCGTCTCAGTTCATTAGGGCAC  
 397 CGGACAGGTCCGTCTTGACAAAAGAACCAGGGCGCCCTGCGCTGACAGCCGGAACACGGCGGCATCAGAGCAGCCGATTGTC  
 398 TGTTGTGCCAGTATAGCCGAATAGCCTCTCCACCCAAGCGGCCGGAGAACCTGCGTGCAATCCATCTTGTTCATCATGCG  
 399 AAACGATCCTCATCTGTCTCTTGATCAGATCTTGAT

401 **Supplementary Note 5**

402 **pL-tetO promoter and PCR primers**

403 CTCGAGTCCCTATCAGTGATAGAGATTGACATCCCTATCAGTGATAGAGATACTGAGCACATCAGCAGGACGCACTGACCGAA  
 404 TTCATTAAAGAGGAGAAAGGTACC

|           |                                         |
|-----------|-----------------------------------------|
| pL-tetO-5 | ATCGTCTGAGTCCCTATCAGTGATAGAGATTGACATCC  |
| pL-tetO-3 | ACTCTGGGGCTAGcCATGGTACCTTTCTCCTCTTAAATG |

410 **Supplementary Note 6**

411 **GFP reporter cassette, PCR primer sequences and recombineering oligos**

412 GFP reporter cassette

413 Start codon is in **Blue** and the ZFP binding site is highlighted in **Yellow**, GFP coding  
 414 sequence is in **Green**.

415 CGCGAAATTAATACGACTCACTATAGGGAGACCACAACGGTTTTCCCTCTAGAAATAATTTTGTTTAACTTTAAGAAGGAGATA  
 416 TACAT**ATG**CGGGGTTCT**GCCGCAGTG**GGTATGGCTAGCATGACTGGTGGACAGCAAATGGGTCCGGATCTGTACGACGATGAC  
 417 GATAAGGATCGATGGGGATCCGAATTCGCCACCATGGTGAGCAAGGGCGAGGAGCTGTTCACCGGGGTGGTGCCCATCTGGT  
 418 CGAGCTGGACGGCGACGTAACCGGCCACAAGTTCAGCGTGTCCGGCGAGGGCGAGGGCGATGCCACCTACGGCAAGCTGACCC  
 419 TGAAGTTCATCTGCACCACCGCAAGCTGCCCGTGCCCTGGCCACCCTCGTGACCACCTTGACCTACGGCGTGCAGTGTCTC  
 420 GCCCGTACCCCGACCATGAAGCAGCACGACTTCTTCAAGTCCGCCATGCCGAAGGCTACGTCCAGGAGCGCACCATT  
 421 CTTCAAGGACGACGGCAACTACAAGACCCGCGCGAGGTGAAGTTCGAGGGCGACACCCTGGTGAACCGCATCGAGCTGAAGG  
 422 GCATCGACTTCAAGGAGGACGGCAACATCCTGGGGCAAGCTGGAGTACAACACAAGCCACAAGGTCTATATCACCGCC  
 423 GACAAGCAGAAGAACGGCATCAAGTGAAGTTCAGACCCGCCACAACATCGAGGACGGCAGCGTGCAGCTCGCCGACCACTA  
 424 CCAGCAGAACACCCCATCGGCGACGGCCCCGTGTGCTGCCCGACAACCCTACCTGAGCACCCAGTCCGCCCTGAGCAAAG  
 425 ACCCAACGAGAAGCGCGATCACATGGTCTGTGAGGTTCTGTGACCGCCCGCGGATCACTCTCGGCATGGACGAGCTGTAC  
 426 AAGTAACTCGAGAAGCTTGATCCGGCTGCTAACAAAGCCCGAAAGGAAGCTGAGTTGGCTGCCACCGCTGAGCAATAACT  
 427 AGCATAACCCCTTGGGGCTCTAAACGGGTCTTGAGGGGTTTTTTTGTGAAAGGAGGAACACTATATCCGGATCTGGCGT

432 Primers for reporter integration

|             |                                                               |
|-------------|---------------------------------------------------------------|
| 5'-galk-gfp | atcaaaccgtgatcagttgtgaccacgcgatgaccgtaacCGCGAAATTAATACGACTCAC |
| 3'-gfp-galk | gtcgagctgattttcataatcggctgcatcacgcgaactACGCCAGATCCGGATATAGTTC |

433 Oligo designed for reporter modification

434 The start codon position (ACG/ATG) is in **Red**, and the ZF/TALE binding site is  
 435 highlighted in **yellow** and **blue** respectively. \* is the phosphothioester bond.

|                    |                                                                                                                            |
|--------------------|----------------------------------------------------------------------------------------------------------------------------|
| ZFP-ACG            | C*T*CTAGAAATAATTTTGTTTAACTTTAAGAAGGAGATATACAA <b>ACG</b> CGGGTTCT <b>GCC</b><br><b>GCAGTGG</b> TATGGCTAGCATGACTGGTGG*A*C*A |
| TAL-ACG-3bp-spacer | TAATTTTGTTTAACTTTAAGAAGGAGATATACATACGAc <b>GGGAAGAATCGTGA</b> GATGGC                                                       |

|                     |                                                                                                     |
|---------------------|-----------------------------------------------------------------------------------------------------|
|                     | TAGCATGACTGGTGGACAGCAAATGGGTCG                                                                      |
| TAL-ACG-6bp-spacer  | TTGTTTAACTTTAAGAAGGAGATATACATACGATTAGGGGAAGAATCGTGA GTATGGCT<br>AGCATGACTGGTGGACAGCAAATGGGT         |
| TAL-ACG-9bp-spacer  | TTGTTTAACTTTAAGAAGGAGATATACATACGATTAGTCTGGGAAGAATCGTGA GTATG<br>GCTAGCATGACTGGTGGACAGCAAATGGGT      |
| TAL-ACG-12bp-spacer | ACTTTAAGAAGGAGATATACATACGATTAGTCTGTTGGGAAGAATCGTGA GTATGGCTAG<br>CATGACTGGTGGACAGCAAATGGGTCTGGGA    |
| TAL-ACG-15bp-spacer | TTGTTTAACTTTAAGAAGGAGATATACATACGATTAGTCTGTTTACGGGAAGAATCGTGA<br>GTATGGCTAGCATGACTGGTGGACAGCAA       |
| APOBEC1-ACG-ZFP     | C*T*C*TAGAAATAATTTTGTTTAACTTTAAGAAGGAGATATACAAACGAAACAACAAGC<br>CGCAGTGGGTATGGCTAGCATGACTGGTG*G*A*C |
| APOBEC3F-ACG-ZFP    | C*T*C*TAGAAATAATTTTGTTTAACTTTAAGAAGGAGATATACATACGAAACAACAAGC<br>CGCAGTGGGTATGGCTAGCATGACTGGTG*G*A*C |
| APOBEC3G-ACG-ZFP    | C*T*C*TAGAAATAATTTTGTTTAACTTTAAGAAGGAGATATACACACGCAACAACAAGC<br>CGCAGTGGGTATGGCTAGCATGACTGGTG*G*A*C |
| APOBEC1-ACG-TAL     | C*C*TCTAGAAATAATTTTGTTTAACTTTAAGAAGGAGATATACAAACGATTAGTCTGGG<br>AAGAATCGTGA GTATGGCTAGCATGACTGG*T*G |
| APOBEC3F-ACG-TAL    | C*C*TCTAGAAATAATTTTGTTTAACTTTAAGAAGGAGATATACATACGATTAGTCTGGG<br>AAGAATCGTGA GTATGGCTAGCATGACTGG*T*G |
| APOBEC3G-ACG-TAL    | C*T*CTAGAAATAATTTTGTTTAACTTTAAGAAGGAGATATACACACGCTTAGTCTGGGA<br>AGAATCGTGA GTATGGCTAGCATGACTGG*T*G  |
| ATG-NNCAA-ZFP       | A*A*TTTTGTTTAACTTTAAGAAGGAGATATACAAATGANNCAATTATTACTGCCGCAGT<br>GTGGTATGGCTAGCATGACTGGTGGACAGC*A*A  |

439  
440  
441  
442  
443  
444  
445  
446  
447  
448  
449  
450  
451  
452  
453  
454  
455

### Supplementary Note 7

#### Zeocin resistance cassette and PCR primer sequences

TTTGCTGGCCTTTTGTCTCACATGTGTGCTGGGCCAGCCGGCCAGATCTGAGCTCGCGGCCGCGATATCGCTAGCTCGAGCAC  
GTGTTGACAATTAATCATCGGCATAGTATATCGGCATAGTATAATACGACAAGGTGAGGAACATAAACCATGGCCAAGTTGACC  
AGTGCCTTCCGGTGTCTCACCGCGCGACGTCGCGGAGCGGTCGAGTTCTGGACCGACCGGCTCGGGTTCTCCGGGACTT  
CGTGGAGGACGACTTCGCGGTGTGGTCCGGGACGACGTCACCCCTGTTTATCAGCGCGGTCCAGGACCAGGTGGTCCGGGACA  
ACACCTGGCCTGGTGTGGGTGCGCGCCCTGGACGAGCTGTACCGGAGTGGTCCGAGGTCGTGTCCACGAACCTCCGGGAC  
GCCTCCGGGCCGCCATGACCGAGATCGGCGAGCAGCCGTGGGGGCGGGAGTTCGCCCTGCGCGACCCGGCCGCAACTGCGT  
GCACTTCGTGGCCGAGGAGCAGGACTGAGAATCCCGGGATCCTCTAGAGTCGACCTGCAGGCATGCAAGCTTGGCACTGGC  
CGTCGTTTTACAACGTCGTGACTGGGAAAACCTGGCGTTACCAACTTAATCGCCTTGACGACATCCCCCTTTCGCCAGCT  
GGCGTAATAGCGAAGAGGCCCGCACCGATCGCCCTTCCCAACAGTTGCGCAGCCTGAATGGCGAATGGCGCCTGATGCGGTAT  
TTTCTCCTTACGCATCTGTGCGGTATTTACACCGCATATATGGTGCACCTCTCAGTACAATCTGCTCTGATGCCGCATAGTTA  
AGCCAGCCCCGACACCCGCCAACACCCGC

|           |                                                                |
|-----------|----------------------------------------------------------------|
| 5'ung-zeo | ATGGCTAACGAATTAACCTGGCATGACGTGCTGGCTGAAGCTTTTGTGCTGGCCTTTTGTCT |
| 3'zeo-ung | TTACTACTCTCTGCCGGTAATACTGGCATCCAGTCAATCGTCAGCGGGTGTGGCGGGT     |

456  
457  
458  
459  
460  
461  
462  
463  
464  
465

### Supplementary Note 8

#### Test of targeted deamination frequency on a reporter with two ZF binding sites

Although AID was observed to function as a monomer, it has also been postulated that AID forms homodimers and homotetramers based on structural modeling with homologous cytidine deaminases. Having shown that a single ZF binding site was sufficient for ZF-AID editing (**Fig. 1b**), we next sought to test whether we can increase the targeted deamination frequency by adding another zinc finger binding site. This would facilitate dimerization of AID, if it functions as a dimer. To this end, we first sought to modify the reporter by adding two ZF

466 binding sites flanking the targeting site (the broken start codon, ACG) while ensuring that the  
467 modifications would not compromise the expression of the GFP protein. Four different modified  
468 GFP reporters were investigated (**Supplementary Fig. 2a**), however only one reporter in which  
469 an additional ZF binding sequence (5'GCCGACGTG3' in the bottom strand) lay 14bp upstream  
470 of the start codon did not compromise the translation efficiency (**Supplementary Fig. 2b**).  
471 Therefore, we further modified this reporter by mutating its start codon to ACG with MAGE and  
472 used it to conduct further studies. Interestingly, induction of ZF-AID led to similar GFP rescue  
473 frequency (0.1%) on the dimer reporter as the one with a single ZF binding site (0.12%)  
474 (**Supplementary Fig. 2c**), indicating that the targeting a single copy of ZF-AID at the targeting  
475 site is sufficient to exert deaminase activity in the cell. Future experiment with symmetrical zinc  
476 finger DNA binding sites is needed to substantiate this conclusion. Also, test the deamination  
477 frequency of ZF-AID with a mutated dimerization interface might help determine the  
478 *stoichiometry* of the functional ZF-AIDs.

## 479 **Supplementary Note 9**

### 480 **Time course of the targeted deamination frequency and investigation into secondary** 481 **mutations:**

482 The GFP rescue efficiency increased over the time and reached the peak after ZF-AID  
483 induction for 30 hours. Interestingly, prolonged induction of ZF-AIDs led to decreases in GFP  
484 expression (**Supplementary Fig. 3a**) after 30 hours. This decrease was also observed with the  
485 prolonged induction of TALE-C3-AID (**Supplementary Fig. 3b**). To determine the reason for  
486 this decrease, we first isolated single colonies with rescued GFP expression, and then checked  
487 for GFP signal again following a second round of ZF-8aa-AID induction (**Supplementary Fig.**  
488 **3c**). Expression of ZF-8aa-AID led to 1% of GFP+ cells losing GFP signal after 10 hours,  
489 whereas no detectable GFP loss was observed in the uninduced population. An ATG/TAC  
490 →ATA/TAT transition at the start codon accounted for 95% (19/20) of this loss (**Supplementary**  
491 **Fig. 3d**), suggesting that the decline of GFP signal was due to the accumulation of secondary  
492 mutations close to the targeted site. Future investigation is needed to achieve sequence specific  
493 targeting with single nucleotide resolution. Also, this observation suggests that ZFP-AIDs can  
494 edit cytosines on both sense and antisense strands effectively.

## 495 **Supplementary Note 10**

### 496 **Investigation on the effect of target gene transcription**

497 Recombination-based genome editing is reportedly more efficient if the target locus is  
498 transcriptionally active and transcription is required for AID's activity in vitro and in vivo,  
499 presumably by exposing the non-transcribed strand as ssDNA substrate for AID. We sought to  
500 determine whether transcription of the targeted site is necessary for ZF-AID function. In our  
501 reporter systems described in the manuscript, GFP and targeted deaminase were both induced  
502 by IPTG, with the result that GFP is inevitably transcriptionally active during deaminase  
503 targeting. To investigate the editing frequency on a non-active target locus, we built an  
504 orthogonal inducible expression system. GFP is transcribed from the T7 promoter  
505 (**Supplementary Fig. 4a**) using T7 polymerases transcribed from pTac promoter and induced  
506 by Isopropyl-β-D-thio-galactoside (IPTG) (100uM). ZF-AID expression was controlled by p<sub>L</sub>-tetO  
507 (**Supplementary Fig. 4b**), a modified version of the native Phage P<sub>L</sub> promoter containing two  
508 TetR operator sites, so that the transcription is inhibited by the TetR protein (constitutively  
509 expressed in the EcNR2 strain) and induced by anhydrotetracycline (aTc) (30ng/ml). We then  
510 induced ZF-AID expression for 10 hours either with or without simultaneous induction of GFP.  
511 Under both conditions the cell culture was diluted 1:1000 in fresh LB media and cultured in the  
512

516 absence of aTc., after which GFP was re-induced in all cells with IPTG (100uM) for 7 hours to  
 517 estimate target site editing frequency (**Supplementary Fig. 4c**).

518  
 519 Induction of ZF-AID and GFP simultaneously led to robust GFP rescue (5.16%)  
 520 (**Supplementary Fig. 4d**). In contrast, significantly lower GFP rescue frequency (0.74%) was  
 521 observed when ZF-AID alone was induced (**Supplementary Fig. 4d**) alone (t-test, two-tailed,  
 522 p<0.0001, n=4). The seven-fold enhancement of GFP rescue in the presence of transcription is  
 523 probably a lower limit, since residual ZF-AID from the aTc induction would still be able to act on  
 524 the transcribed GFP locus during the test for GFP expression. This result suggests that targeted  
 525 deaminase genome editing occurs with increased efficiency if the target locus is in an active.  
 526

527  
 528 **Supplementary Note 11**

529 **GFP and GAPDH amplification and sequence primer sequences**

530

|                       |                                          |
|-----------------------|------------------------------------------|
| Amplification-GFP-5   | Cgtttgcgcgagtcagcgatatccattttcgcggaatccg |
| Amplication-GFP-3     | CGCAGTTACAGCCTACAACTGGTTTTCTGCTTC        |
| Sequencing-GFP-f      | Atgagtctgaaagaaaaaacacaatc               |
| Sequencing-GFP-r      | TGACCGTTAAGCGCGATTTG                     |
| Amplification-GAPDH-5 | Tatttacagtcttaatgagtgaaagaggcggagg       |
| Amplification-GAPDH-3 | Gccatcctggtctaagcttgaaagg                |
| Sequencing-GAPDH-f    | Aggcggagggttttttctcgcctgtgcgcg           |
| Sequencing-GAPDH-r    | Atcaattttcatccgaacgttcc                  |

532  
 533  
 534 **Supplementary Note 12**

535 **Next generation adaptor and PCR primer sequences**

536

|          |         |                                                     |
|----------|---------|-----------------------------------------------------|
| Adaptor1 | PE-A1-F | TACTACTCTTTCCCTACACGACGCTCTTCCGATCT <b>ac*T</b>     |
|          | PE-A1-R | /5Phos/ <b>gt</b> AGATCGGAAGAGCGGTTCAGCAGGAATGCCGAG |
| Adaptor2 | PE-A2-F | TACTACTCTTTCCCTACACGACGCTCTTCCGATCT <b>tg*T</b>     |
|          | PE-A2-R | /5Phos/ <b>ca</b> AGATCGGAAGAGCGGTTCAGCAGGAATGCCGAG |
| Adaptor3 | PE-A3-F | TACTACTCTTTCCCTACACGACGCTCTTCCGATCT <b>tc*T</b>     |
|          | PE-A3-R | /5Phos/ <b>ga</b> AGATCGGAAGAGCGGTTCAGCAGGAATGCCGAG |
| Adaptor4 | PE-A4-F | TACTACTCTTTCCCTACACGACGCTCTTCCGATCT <b>ga*T</b>     |
|          | PE-A4-R | /5Phos/ <b>tc</b> AGATCGGAAGAGCGGTTCAGCAGGAATGCCGAG |
| Adaptor5 | PE-A5-F | TACTACTCTTTCCCTACACGACGCTCTTCCGATCT <b>ag*T</b>     |
|          | PE-A5-R | /5Phos/ <b>ct</b> AGATCGGAAGAGCGGTTCAGCAGGAATGCCGAG |
| Adaptor6 | PE-A6-F | TACTACTCTTTCCCTACACGACGCTCTTCCGATCT <b>gt*T</b>     |
|          | PE-A6-R | /5Phos/ <b>ac</b> AGATCGGAAGAGCGGTTCAGCAGGAATGCCGAG |
| Adaptor7 | PE-A7-F | TACTACTCTTTCCCTACACGACGCTCTTCCGATCT <b>ct*T</b>     |

537

|             |          |                                                  |
|-------------|----------|--------------------------------------------------|
|             | PE-A7-R  | /5Phos/agAGATCGGAAGAGCGGTTACAGCAGGAATGCCGAG      |
| Adaptor8    | PE-A8-F  | TACACTCTTTCCCTACACGACGCTCTTCCGATCT ca*T          |
|             | PE-A8-R  | /5Phos/tgAGATCGGAAGAGCGGTTACAGCAGGAATGCCGAG      |
| PCR primers | PE-PCR-1 | AATGATACGGCGACCACCGAGATCTACACTCTTCCCTACACGAC     |
|             | PE-PCR-2 | CAAGCAGAAGACGGCATACGAGATCGGTCTCGGCATTCCTGCTGAACC |

538  
539  
540  
541  
542  
543  
544  
545  
546  
547  
548  
549  
550  
551  
552  
553  
554  
555  
556  
557  
558  
559  
560  
561  
562  
563  
564  
565  
566  
567  
568  
569  
570  
571  
572  
573  
574  
575  
576  
577  
578  
579  
580  
581  
582  
583  
584

**Supplementary Note 13**

**Human GFP-ACG reporter sequence and genotyping primers**

The pEF-1α promoter sequence is in Blue, the GFP ORF is in Green and the IRES is highlighted in Gray and the mcherry ORF is in Red. Of note, the barcode sequence is highlighted in Yellow.

TGCAAAGATGGATAAAGTTTTAAACAGAGAGGAATCTTTGCAGCTAATGGACCTTCTAGGTCTTAAAGGAGTGGGAATTGGC  
TCCGGTGCCTCGTCACTGGGCAGAGCGCACATCGCCACAGTCCCGGAGAAGTTGGGGGGAGGGGTCGGCAATTGAACCGGTGC  
CTAGAGAAGGTGGCGCGGGTAACTGGGAAAGTGTGTCGTACTGGCTCCGCTTTTCCCGAGGGTGGGGGAGAACCGT  
ATATAAGTGCAGTAGTCGCCGTGAACGTTCTTTTTTCGCAACGGGTTTGCCGCCAGAACACAGGTAAGTGCCGTGTGTGGTTCC  
CGCGGGCCTGGCCTCTTTACGGGTTATGGCCCTTGCGTGCCTTGAATTACTTCCACTGGCTGCAGTACGTGATTCTTGATCCC  
GAGCTTCGGGTTGGAAGTGGGTGGGAGAGTTCGAGGCCTTGCGCTTAAGGAGCCCTTCGCCTCGTGTCTGAGTTGAGGCCTG  
GCCTGGGCGCTGGGGCCGCGCGTGCGAATCTGGTGGCACCTTCGCGCCTGTCTCGTGTCTTCGATAAGTCTCTAGCCATTT  
AAAATTTTGTATGACTGTCTGCGACGCTTTTTTCTGGCAAGATAGTCTTGTAAATGCGGGCCAAGATCTGCACACTGGTATT  
TCGGTTTTTGGGGCCCGGGCGGCGACGGGGCCCGTGCCTCCAGCGCACATGTTCCGGCAGGCGGGGCTGCGAGCGCGGCC  
ACCGAGAATCGGACGGGGTAGTCTCAAGCTGGCCCGCTGCTTGGTGCCTGGCCTCGCGCCGCGTGTATGCCCCGCGCT  
GGCGGCAAGGCTGGCCCGTCCGACCCAGTTGCGTGAGCGGAAAGATGGCCGCTTCCCGGCCCTGCTGCAGGGAGCTCAAAA  
TGGAGGACGCGGCGCTCGGGAGAGCGGGCGGGTGAAGTACCCACACAAAGGAAAAGGGCCTTCCGCTCCTCAGCCGTGCTTC  
ATGTGACTCCACGGAGTACCGGGCGCGTCCAGGCACCTCGATTAGTTCTCGAGCTTTTGGAGTACGTGCTTTTAGGTTGGG  
GGGAGGGTTTTATGCGATGGAGTTTCCCCACACTGAGTGGGTGGAGACTGAAGTTAGGCCAGCTTGGCACTTGATGTAATTC  
TCCTTGAATTTGCCCTTTTGTAGTTTGGATCTTGGTTTATTCTCAAGCCTCAGACAGTGGTTCAAAGTTTTTTTTCTTCCATT  
TCAGGTGTGCTGACGTACGHHHHHHHTCCAGTAGCAGACCTACGGCCACCACGCGGGGTTCTGCCGAGTGGATCGATGGG  
ATCCGAATTCGCCACCGTGAAGCAAGGCGAGGAGCTGTTACCAGGGGTGGTGGCCATCCTGGTGCAGCTGGACGGCGAGCTAA  
ACGGCCACAAGTTCAGCGTGTCCGGCAGGGCGAGGGCGATGCCACCTACGGCAAGCTGACCTGAAAGTTTCTCAGCACACC  
GGCAAGCTGCCGTGCCCTGGCCACCCTCGTGACCACCCTGACCTACGGCGTGCAGTGTCTCAGCCGCTACCCGACCAT  
GAAGCAGCAGACTTCTCAAGTCCGCCATGCCGAAGGCTACGTCCAGGAGCGCACCATCTTCTCAAGGACGACGGCAACT  
ACAAGACCCGCGCCGAGGTGAAGTTGAGGGCGACACCCTGGTGAACCGCATCGAGCTGAAGGGCATCGACTTCAAGGAGGAC  
GGCAACATCTGGGGCAAGCTGGAGTACAACATAACAGCCACAACGTCTATATCATGGCCGACAAGCAGAAGAACGGCAT  
CAAGGTGAACCTCAAGATCCGCCACAACATCGAGGACGGCAGCGTGCAGCTCGCCGACCATACCAGCAGAACACCCCATCG  
GCGACGGCCCGTGTGCTGCGCCGACAACCCTACCTGAGCACCAGTCCGCCCTGAGCAAAGCCCAACGAGAAGCGCGAT  
CACATGGTCTGCTGGAGTTTCTGACCGCCCGGGATCACTCTCGGCATGGACGAGCTGTACAAGTAAGGCGCGCCCCCCC  
TAACGTTACTGGCCGAAGCCGCTTGAATAAGGCCGGTGTGCGTTTGTCTATATGTTATTTTCCACCATATTGCCGCTTTTTG  
GCAATGTGAGGGCCCGAAACCTGGCCCTGTCTTCTTGACGAGCATTCCTAGGGGTCTTTCCCTCTCGCCAAAGGAATGCAA  
GGTCTGTTGAATGTCGTGAAGGAAGCAGTTCCTCTGGAAGCTTCTTGAAGACAAACAACGTCTGTAGCGACCCCTTGCAGGCA  
GCGGAACCCCACTGGCGACAGGTGCCTCTGCGCCAAAAGCCAGTGTATAAGATACACCTGCAAAGGCGGCACAACCC  
AGTGCCACGTTGTGAGTTGGATAGTTGTGAAAGAGTCAAATGGCTCTCCTCAAGCGTATTCAACAAGGGGCTGAAGGATGCC  
CAGAAGGTACCCATGTATGGGATCTGATCTGGGCCCTCGGTGCACATGCTTTTACATGTGTTTGTAGTGTGTTAAAAAACGT  
CTAGGCCCCCGAACCACGGGGACGTGGTTTTCTTTGAAAAACAGATGATAATATGGCCACAACCATGGTGAAGGGCG  
AGGAGGATAACATGGCCATCATCAAGGAGTTTATGCGCTTCAAGGTGCACATGGAGGGCTCCGTGAACGGCCACGAGTTCGAG  
ATCGAGGGCGAGGGCGAGGGCCGCCCTACGAGGGCACCCAGACCGCCAAGCTGAAGGTGACCAAGGGTGGCCCCCTGCCCTT  
CGCCTGGGACATCCTGTCCCTCAGTTCATGTACGCTTCAAGGCCTACGTGAAGCACCCCGCCGACATCCCGACTACTTGA  
AGCTGTCTTCCCGAGGGCTTCAAGTGGGAGCGCGTGTGAACCTCGAGGACGGCGCGGTGGTGAACCGTACCCAGGACTCC  
TCCCTGCAGGACGGCGAGTTCATCTCAAGGTGAAGTGTGCGCCGCAACACTCCCTCCGACGGCCCGTAAATGCAGAAGAA  
GACCATGGGCTGGGAGGCTCTCCGAGCGGATGTACCCCGAGGACGGCGCCCTGAAGGGCGAGATCAAGCAGAGGCTGAAGC  
TGAAGGACGGCGGCCACTACGACGCTGAGGTCAAGACCCTACAAGGCCAAGAAGCCGTCAGCTGCCCGGCGCTACAAC

585 GTCAACATCAAGTTGGACATCACCTCCCACAACGAGGACTACCCATCGTGGAACAGTACGAACGCGCCGAGGGCCGCACTC  
586 CACCGCGGCATGGACGAGCTGTACAAGTAA  
587  
588

### Supplementary Note 14

#### UGI encoding sequence and primers

UGI encoding sequence: NLS is highlighted in **Yellow**.

591 ATGACAAATCTGAGCGATATTATAGAAAAAGAGACTGGTAAACAGCTCGTGATTCAAGAGAGTATCCTTATGCTGCCTGAGGA  
592 AGTGAAGAAGTTATCGGCAATAAACCCGAGTCCGACATTCTGGTGACACCGGCTATGATGAAAGCACCGACGAAAAATGTGA  
593 TGCTGCTTACTAGCGACGCTCCAGAGTACAAGCCATGGGCCCTGGTGATTCAAGACAGTAACGGAGAGAATAAGATCAAAATG  
594 CTC**TCCGGACTCAGATCTCGAGCTGATCCAAAAAAGAAGAGAAAGGTAGATCCAAAAAAGAAGAGAAAGGTAGATCCAAAAA**  
595 **GAAGAGAAAGGTA**  
596  
597  
598

|           |                                              |
|-----------|----------------------------------------------|
| BsiWI-UGI | TAGGGGCGTACGGCCACCATGACAAATCTGAGCGATATTATA   |
| XhoI-UGI  | TCAGCTCGAGATCTGAGTCCGGAGAGCATTTTGATCTTATTCTC |

599

600

601

### Supplementary Note 15

#### ZF-AID-NLS/ZFP-AID<sup>ANES</sup> sequences and primers

602 ZF-AID sequence: The NLS is highlighted in **Yellow**. ZF is in **Red**, the linker is in  
603 **Green** and the deaminase is in **Blue**. Of note, the nucleus export signal (NES)  
604 highlighted in **Gray** at the C-terminus of the deaminase was missing in ZF- AID<sup>ANES</sup>.

605

606

607

608

609

610

611

612

613

614

615

616

617

618

619

620

621

622

623

624

ATGGCTAGCCCCAGAGTGAGAACCGGTTCTAAGACACCTCCCCAGAGAGGCCTTTTCAGTGTAGAATTTGTATGCGTAATTT  
TTCTAGGTCGGATGTGCTGGCCAATCACACAAGGACTCACACTGGTAAAAGCCCTTCCAATGTAGAATTTGTATGCGCAATT  
TTTCTCAATCTTCTACTCTGACTAGACATCTGAGGACCCACACAGGCGAAAAGCCCTTCCAGTGCAGAATTTGTATGAGAAAT  
TTTTCTGAAAGACAGGGTCTGAAAAGACATCTGAAGACACATACAGGTGAAAAGGATCCTCTGGTGGTGGTCTGGGTTCTAC  
TGACAGCCTCTTGATGAACCGGAGGAAGTTCTTTACCAATTCAAAAATGTCCGCTGGGCTAAGGGTCGGCGTGAGACCTACC  
TGTGCTACGTAGTGAAGAGGCGTGACAGTGCTACATCCTTTTCACTGGACTTTGGTTATCTTCGCAATAAGAACGGCTGCCAC  
GTGGAATTTGCTCTTCTCCGCTACATCTCGGACTGGGACCTAGACCCTGGCCGCTGCTACCGCGTCACCTGGTTACCTCCTG  
GAGCCCCTGCTACGACTGTGCCCCGACATGTGGCCGACTTTCTGCGAGGGAACCCCAACCTCAGTCTGAGGATCTTACCCGCGC  
GCCTTACTTCTGTGAGGACCGCAAGGCTGAGCCGAGGGCTGCGCGGCTGCACCGCGCCGGGTTGCAAAATAGCCATCATG  
ACCTTCAAAGATTATTTTACTGCTGGAATACTTTTGTAGAAAACCACGAAAGAACTTTCAAAGCCTGGGAAGGGCTGCATGA  
AAATTCAGTTCTGCTCTCCAGACAGCTTCCGCGCATCCTTTTGGCCCTGATGAGGTTGATGACTTACGAGACGCATTTTCGTA  
CTTTGGGACTTCCGACTCAGATCTCGAGCTGATCCAAAAAAGAAGAGAAAGGTAGATCCAAAAAAGAAGAGAAAGGTAGAT  
CCAAAAAAGAAGAGAAAGGTA

|            |                                                                                                                                      |
|------------|--------------------------------------------------------------------------------------------------------------------------------------|
| BsiWI-ZF   | ATAGGGGCGTACGGCCACCATGGCTAGCCCCAGAGTGAGAACCGGT                                                                                       |
| BsrGI-AID  | TACTTGTACATTATACCTTTCTCTTTTGGATCTACCTTTCTCTCTTTTTTGGATCT<br>ACCTTTCTCTTTTGGATCAGCTCGAGATCTGAGTCCGGAAGTCCCAAAGTACGAAA<br>TGCGTCTCGTAA |
| BsrG1-ΔAID | CTTACTTGTACATTATACCTTTCTCTTTTGGATCTACCTTTCTCTCTTTTTTGGAT<br>CTACCTTTCTCTTTTGGATCAGCTCGAGATCTGAGTCCGACAGGGGCAAAAGGATG<br>CGCCGAAG     |

625

626

627

### Supplementary Note 16

628

629

#### ZF<sub>GFPIN</sub>- AID<sup>ANES</sup> s/ZF<sub>GFPIN</sub> Ns sequence and primers

630

631 The SV40 NLS is highlighted in **Yellow**. ZF<sub>GFPIN</sub> (ZF<sub>GFPINL</sub>/ZF<sub>GFPINR</sub>) modules are in **Red**,  
632 nuclease/deaminase with the linkers is in **Blue**.  
633

634 ZF<sub>GFPINL</sub>-AID<sup>ANES</sup>  
635 ATGGGA**CCTAAGAAAAAGAGGAAGGTG**GCGGCCGCTGACTACAAGGATGACGACGATAAATCTAGACCCGGGGAGCGCCCTT  
636 CCAGTGTGCGATTTGCGATGCGGAACTTTTCGCAGGACTCCTCCCTGCGGCGGCATACCCGTACTCATAACCGGTGAAAAACCGT  
637 TTCAGTGTGCGATCTGTATGCGAAATTTCTCCCGGAGGAGCACCTGGTGC GG CATCTACGTACGCACACCGGCGAGAAGCCA  
638 TTCCAATGCCGAATATGCATGCGCAACTTCAGTGACCCACCTCCCTGAACCGGCATCTGAAGACACATACAGGTGAAAAAGG  
639 ATCCCTGGTGGTGGACTGGGGTGCAGCTGACAGCCTCTTGATGAACCGGAGGAAGTTCTTTACCAATTCAAAAAATGTCCGCT  
640 GGGTAAGGGTCGGCGTGAGACCTACCTGTGCTACGTAGTGAAGAGGCGTGACAGTGCTACATCCTTTTCACTGGACTTTGGT  
641 TATCTTCGCAATAAGAACCGGTGCCAGTGGAAATGCTCTTCCCTCCGCTACATCTCGGACTGGGACCTAGACCCTGGCCGCTG  
642 CTACCGGTCACCTGGTTACCTCCTGGAGCCCTGTCTACGACTGTGCCGACATGTGGCCGACTTTCTGCGAGGGAACCCCA  
643 ACCTCAGTCTGAGGATCTTACCGGCGCCTCTACTTCTGTGAGGACCGCAAGGCTGAGCCCGAGGGGCTGCGGCGGCTGCAC  
644 CGCGCCGGGTGCAAAATAGCCATCATGACCTTCAAAGATTATTTTTACTGCTGGAATACTTTTGTAGAAAAACACGAAAGAAC  
645 TTTCAAAGCCTGGGAAGGGCTGCATGAAATTCAGTTCGTCTCTCCAGACAGCTTCGGCGCATCCTTTTGCCCTGTATGAGG  
646 TTGAT  
647

648 ZF<sub>GFPINR</sub>-AID<sup>ANES</sup>  
649 ATGGGA**CCTAAGAAAAAGAGGAAGGTG**GCGGCCGCTGACTACAAGGATGACGACGATAAATCTAGACCCGGGGAGCGCCCTT  
650 CCAGTGTGCGATTTGCGATGCGGAACTTTTCGTCCAGACCAGCTGGTGC GG CATACCCGTACTCATAACCGGTGAAAAACCGT  
651 TTCAGTGTGCGATCTGTATGCGAAATTTCTCCAGTCCACCACCTGAAGCGGCATCTACGTACGCACACCGGCGAGAAGCCA  
652 TTCCAATGCCGAATATGCATGCGCAACTTCAGTCAGCGGAACAACCTGGGCGGCATCTGAAGACACATACAGGTGAAAAAGG  
653 ATCCCTGGTGGTGGACTGGGGTGCAGCTGACAGCCTCTTGATGAACCGGAGGAAGTTCTTTACCAATTCAAAAAATGTCCGCT  
654 GGGTAAGGGTCGGCGTGAGACCTACCTGTGCTACGTAGTGAAGAGGCGTGACAGTGCTACATCCTTTTCACTGGACTTTGGT  
655 TATCTTCGCAATAAGAACCGGTGCCAGTGGAAATGCTCTTCCCTCCGCTACATCTCGGACTGGGACCTAGACCCTGGCCGCTG  
656 CTACCGGTCACCTGGTTACCTCCTGGAGCCCTGTCTACGACTGTGCCGACATGTGGCCGACTTTCTGCGAGGGAACCCCA  
657 ACCTCAGTCTGAGGATCTTACCGGCGCCTCTACTTCTGTGAGGACCGCAAGGCTGAGCCCGAGGGGCTGCGGCGGCTGCAC  
658 CGCGCCGGGTGCAAAATAGCCATCATGACCTTCAAAGATTATTTTTACTGCTGGAATACTTTTGTAGAAAAACACGAAAGAAC  
659 TTTCAAAGCCTGGGAAGGGCTGCATGAAATTCAGTTCGTCTCTCCAGACAGCTTCGGCGCATCCTTTTGCCCTGTATGAGG  
660 TTGAT  
661

662  
663 ZF<sub>GFPINL</sub>-N  
664 ATGGGA**CCTAAGAAAAAGAGGAAGGTG**GCGGCCGCTGACTACAAGGATGACGACGATAAATCTAGACCCGGGGAGCGCCCTT  
665 CCAGTGTGCGATTTGCGATGCGGAACTTTTCGCAGGACTCCTCCCTGCGGCGGCATACCCGTACTCATAACCGGTGAAAAACCGT  
666 TTCAGTGTGCGATCTGTATGCGAAATTTCTCCCGGAGGAGCACCTGGTGC GG CATCTACGTACGCACACCGGCGAGAAGCCA  
667 TTCCAATGCCGAATATGCATGCGCAACTTCAGTGACCCACCTCCCTGAACCGGCACCTAAAAACCCACCTGAGGGGATCCCA  
668 ACTAGTCAAAAGTGAAGTGGAGGAGAAGAAATCTGAACCTTCGTCTAAATGAAATATGTGCCTCATGAATATATGAAATTA  
669 TTGAAATGCGAGAAATTCACCTCAGGATAGAATCTTGAAATGAAGGTAATGGAATTTTTATGAAAGTTTATGGATATAGA  
670 GGTAACATTTGGGTGGATCAAGGAAACCGGACGGAGCAATTTATACTGTGCGATCTCCTATTGATTACGGTGTGATCGTGGA  
671 TACTAAAGCTTATAGCGGAGTTATAATCTGCCAATTGGCCAAGCAGATGAAATGCAACGATATGTGCAAGAAAAACAAACAC  
672 GAAACAAACATATCAACCTAATGAATGGTGGAAAGTCTATCCATCTTCTGTAACGGAATTTAAGTTTTATTTGTGAGTGGT  
673 CACTTTAAAGGAAACTACAAAGCTCAGCTTACACGATTAATCATATCACTAATGTAATGGAGCTGTCTTAGTGTAGAAGA  
674 GCTTTTAATTTGGTGGAGAAATGATTAAGCCGGCACATTAACCTTAGAGGAAGTGAAGCGGAAATTTAATAACGGCGAGATAA  
675 ACTTT  
676

677 ZF<sub>GFPINR</sub>-N  
678 ATGGGA**CCTAAGAAAAAGAGGAAGGTG**GCGGCCGCTGACTACAAGGATGACGACGATAAATCTAGACCCGGGGAGCGCCCTT  
679 CCAGTGTGCGATTTGCGATGCGGAACTTTTCGTCCAGACCAGCTGGTGC GG CATACCCGTACTCATAACCGGTGAAAAACCGT  
680 TTCAGTGTGCGATCTGTATGCGAAATTTCTCCAGTCCACCACCTGAAGCGGCATCTACGTACGCACACCGGCGAGAAGCCA  
681 TTCCAATGCCGAATATGCATGCGCAACTTCAGTCAGCGGAACAACCTGGGCGGCACCTAAAAACCCACCTGAGGGGATCCCA  
682 ACTAGTCAAAAGTGAAGTGGAGGAGAAGAAATCTGAACCTTCGTCTAAATGAAATATGTGCCTCATGAATATATGAAATTA  
683 TTGAAATGCGAGAAATTCACCTCAGGATAGAATCTTGAAATGAAGGTAATGGAATTTTTATGAAAGTTTATGGATATAGA  
684 GGTAACATTTGGGTGGATCAAGGAAACCGGACGGAGCAATTTATACTGTGCGATCTCCTATTGATTACGGTGTGATCGTGGA  
685 TACTAAAGCTTATAGCGGAGTTATAATCTGCCAATTGGCCAAGCAGATGAAATGCAACGATATGTGCAAGAAAAACAAACAC  
686 GAAACAAACATATCAACCTAATGAATGGTGGAAAGTCTATCCATCTTCTGTAACGGAATTTAAGTTTTATTTGTGAGTGGT  
687 CACTTTAAAGGAAACTACAAAGCTCAGCTTACACGATTAATCATATCACTAATGTAATGGAGCTGTCTTAGTGTAGAAGA  
688 GCTTTTAATTTGGTGGAGAAATGATTAAGCCGGCACATTAACCTTAGAGGAAGTGAAGCGGAAATTTAATAACGGCGAGATAA  
689 ACTTT  
690



691  
692  
693  
694  
695

|             |                                                                                                                                  |
|-------------|----------------------------------------------------------------------------------------------------------------------------------|
| BsiWI-ZFL/R | TGGCAAATATTCTGAAATGAGCTGTTGACAATTAATCATCCGGTCCGTATAATCTGTGGAATTGT<br>GAGCGGATAACAATTTACACAAAAGAGGAGAAAGGTACCATGTCGCGGACCCGGCTCCC |
| BamHI-ZFL/R | AGAGGATCCTTTTTTCACCTGTATGTGTCTTCAGATGCCGGCCCAGGTTGTTCCGCTGAC                                                                     |
| NheI-ZFL/R  | TGGCTAGCACCATGGGACCTAAGAAAAAGAGGAAGGTGGCGGCCGCTGACTACAAGGATGACGAC<br>GATAAATCTAGACCCGGGAGCGCCCTTCCAGTGTG                         |
| Apal-ZFL/R  | CTTACCTTCGAAGGGCCCTTAATCAACCTCATA                                                                                                |
